# Supplementary material for: Integrating Ligand-Receptor Interactions and In Vitro Evolution for Streamlined Discovery of Artificial Nucleic Acid Ligands
Source: PubMed Central journal article supplement — Mol Ther Nucleic Acids. 2019 Jun 4;17:150–63. doi: 10.1016/j.omtn.2019.05.015 (PMC6606840; doi:10.1016/j.omtn.2019.05.015), 2019-06-04

OMTN, Volume 17

## Supplemental Information

### **Integrating Ligand-Receptor Interactions and *In Vitro* Evolution for Streamlined Discovery of Artificial Nucleic Acid Ligands**

**Hasan E. Zumrut, Sana Batool, Kimon V. Argyropoulos, Nicole Williams, Roksana Azad, and Prabodhika R. Mallikaratchy**

# **Integrating Ligand-receptor Interactions and *In Vitro* Evolution for Streamlined Discovery of Artificial Nucleic Acid Ligands**

## **Supporting Information**

Hasan E. Zumurut<sup>1,2</sup>, Sana Batool<sup>1</sup>, Kimon V. Argyropoulos<sup>4</sup>, Nicole Williams<sup>3</sup>, Roksana Azad<sup>2</sup>, and Prabodhika R. Mallikaratchy<sup>1,2,3</sup> \*

<sup>1</sup>Department of Chemistry, Lehman College, The City University of New York,  
250 Bedford Park Blvd., West, Bronx, NY 10468, USA

<sup>2</sup>Ph.D. Program in Chemistry and Biochemistry, CUNY Graduate Center  
365 Fifth Avenue, New York, NY 10016, USA

<sup>3</sup>Ph.D. Program in Molecular, Cellular and Developmental Biology, CUNY Graduate Center  
365 Fifth Avenue, New York, NY 10016, USA

<sup>4</sup>Immunology Program, Memorial Sloan Kettering Cancer Center, 408 E 69<sup>th</sup> St., New York, NY,  
10021

\*To whom correspondence should be addressed: Prabodhika Mallikaratchy, Department of Chemistry, Lehman College, The City University of New York, 250 Bedford Park West, Bronx New York, NY 10468; [prabodhika.mallikaratchy@lehman.cuny.edu](mailto:prabodhika.mallikaratchy@lehman.cuny.edu); Phone: 347-577-4082.

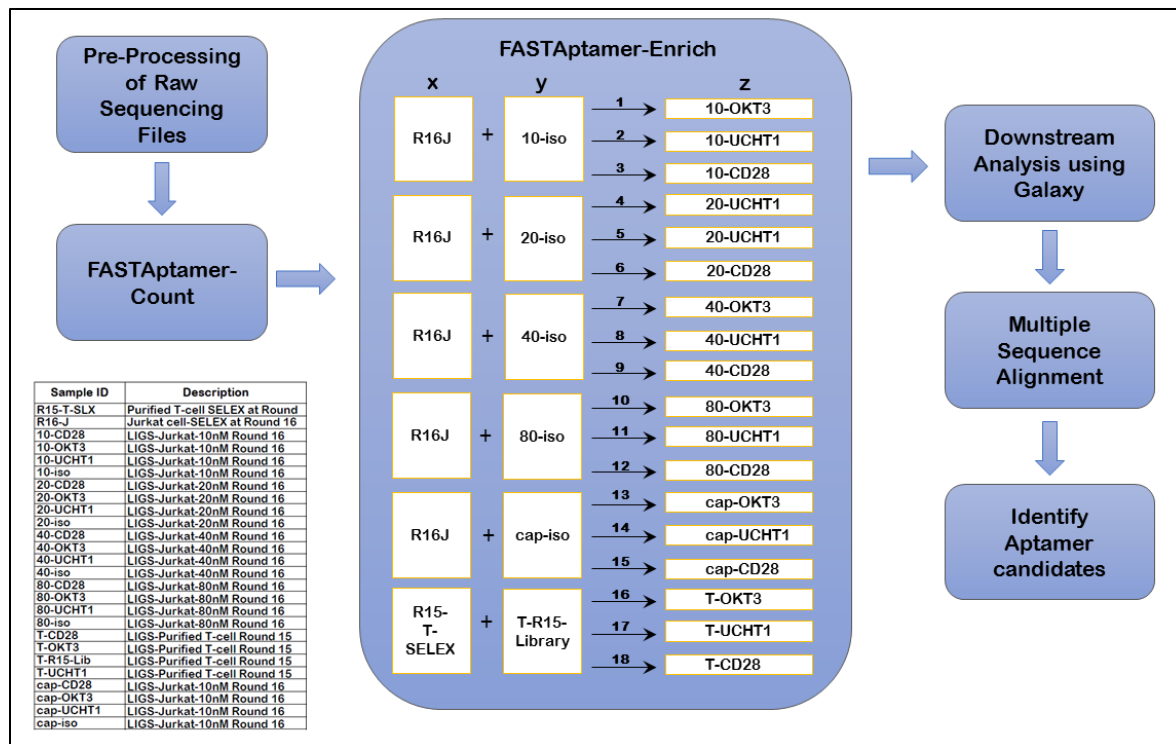

**Figure S1. Flowchart describing the steps involved in bioinformatics analysis of LIGS sequencing data.** First, raw sequencing data was pre-processed to remove two types of reads: 1) Low-quality reads ( $Q < 20$  at a single position) and the reads without intact SELEX primer regions, 2) The reads that are not within 20% range of the randomized SELEX region. Second, FASTAptamer-Count tool was used to obtain read counts and normalized read counts, RPM (reads per million), of each unique sequence (see Table S2 for a summary of FASTAptamer-Count results). These data were then analyzed with FASTAptamer-Enrich tool to obtain fold-enrichment values. Inputs for each FASTAptamer-Enrich run were defined as:  $x$  = final enriched cell-SELEX library (i.e., Round 16),  $y$  = LIGS pool from isotype control antibody, and  $z$  = the specific monoclonal antibodies (OKT3, UCHT1 or anti-CD28). A total of 18 tabular FASTAptamer Enrich files as listed in Table S3 were generated using the combinations as outlined by the numbered arrows. Then the downstream analysis was performed on the tabular FASTAptamer-Enrich files using GALAXY server. Analysis of sequences in GALAXY server included following steps: first, the filter tool was applied as  $RPM \geq 1$  to  $x$ . Then a second filter was applied as  $RPM(z/y) \geq 4$  to identify sequences enriched in mAb eluted pools compared to the isotype control. This filter was used as  $RPM(z/y) > 1$  for positive control antibody (anti-CD28) to eliminate sequences eluted by anti-CD28 binding to cells. Finally, the compare tool was used to remove matching sequences between CD3 specific sequences and the sequences identified as hits for anti-CD28. The resulting sequences were converted to FASTA format, concatenated and aligned using ClustalW. Finally, the aptamer candidates were picked based on the multiple sequence alignment results.

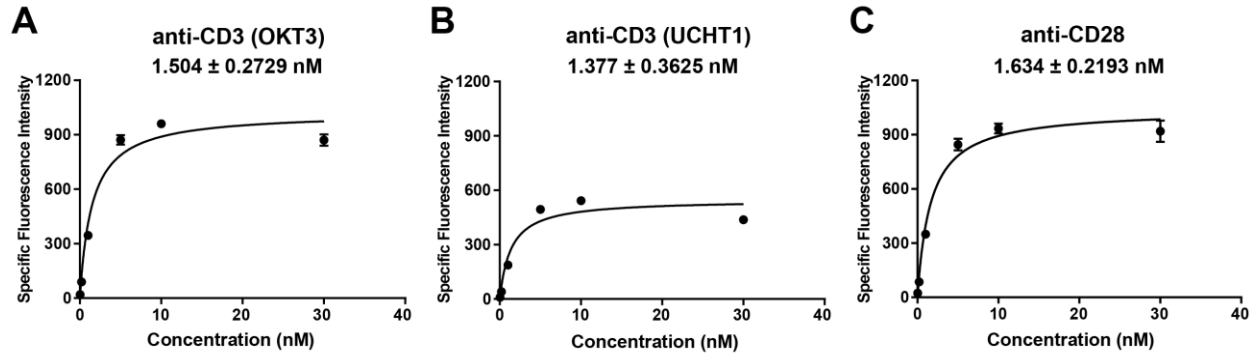

**Figure S2. Affinity analysis of OKT3, UCHT1 and anti-CD28 antibodies against Jurkat.E6 cells at 25 °C.**

Binding curves are shown for each monoclonal antibody used during LIGS; (A) OKT3, (B) UCHT1 (C) anti-CD28. Affinity analyses were performed by incubating  $2.0 \times 10^5$  Jurkat.E6 cells with a serially diluted unlabeled antibody for 45 min at 25 °C in cell suspension buffer used in SELEX. For each mAb the following final concentrations were used: 0.04 nM, 0.2 nM, 1 nM, 5 nM 10 nM and 30 nM. The assay was performed in triplicates. The isotype control antibody was used at 30 nM. After the incubation with primary antibodies, the cells were washed twice using 2 mL of RPMI, followed by secondary antibody staining using Alexa Fluor 647<sup>®</sup>-conjugated Goat Anti-Mouse IgG at a final concentration of 5 µg/mL for 30 min. on ice. The cells were then washed again twice with 2 mL RPMI and reconstituted in 300 µL of RPMI. And the binding events were analyzed using flow cytometry (BD FACScan). The specific binding of mAbs was calculated by subtracting the median fluorescence intensity obtained by isotype control from that of mAbs at each concentration. The binding curves were constructed by plotting the specific median fluorescence intensity values for each concentration as a function of mAb concentration on GraphPad Prism software using one-site specific binding. The Kd values were calculated by GraphPad Prism software using the formula:  $Y = \frac{B_{max} * X}{(Kd + X)}$ .

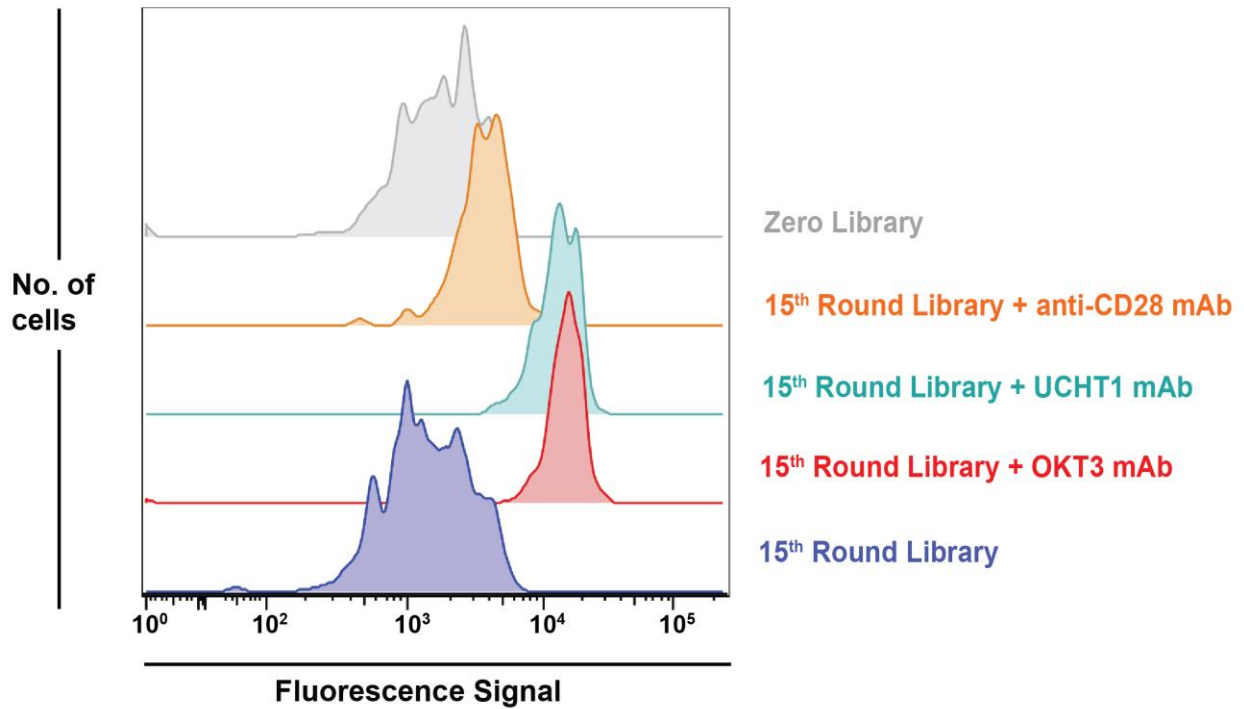

**Figure S3. Flow cytometric analysis of CD3 and CD28 expression of T-cells isolated from PBMCs.** Following LIGS, the PBMCs were subjected to secondary antibody staining. The Alexa Fluor 647<sup>®</sup>-conjugated goat anti-mouse IgG at 5  $\mu\text{g}/\text{mL}$  incubated for 30 min on ice, washed and analyzed by flow cytometry to evaluate the binding of mAbs. Histograms obtained at round 0 library (gray) and 15<sup>th</sup> round library (purple) did not contain any primary mAbs, hence they represent the background fluorescence signal. Red, green and orange histograms corresponds to samples incubated with OKT3, UCHT1 and anti-CD28 mAbs during LIGS respectively. Increased fluorescence signal after secondary antibody staining is observed for all samples with OKT3 and UCHT1 mAbs (red and green histograms) and to a lesser degree with anti-CD28 mAb (orange histogram) compared to the background signal, confirming the CD3 and the CD28 receptor expression on T cells isolated from PMBCs, which was used during LIGS.

**Table S1. List of all sequencing library pools with sample names and descriptions.**

| Sample No. | Description                           | Sample ID | Barcode Sequence (Illumina) | PF Clusters | % of Lane | % Perfect Barcode | % One Mismatch Barcode | Yield (Mbases) | % PF Clusters | % ≥ Q30 Bases | Mean Quality Score |
|------------|---------------------------------------|-----------|-----------------------------|-------------|-----------|-------------------|------------------------|----------------|---------------|---------------|--------------------|
| 1          | Jurkat cell-SELEX at Round 7          | R7        | CGTACTAG                    | 22,088,216  | 7.34      | 96                | 3.96                   | 2,231          | 63.28         | 89.69         | 37.8               |
| 2          | Jurkat cell-SELEX at Round 9          | R9        | AGGCAGAA                    | 45,124,139  | 15        | 95                | 5.42                   | 4,558          | 63.17         | 90.16         | 37.92              |
| 3          | Jurkat cell-SELEX at Round 12         | R12       | TCCTGAGC                    | 25,771,275  | 8.57      | 96.72             | 3.28                   | 2,603          | 63.38         | 90.54         | 38.01              |
| 4          | Jurkat cell-SELEX at Round 13         | R13       | GGACTCCT                    | 44,046,358  | 14.64     | 96                | 3.78                   | 4,449          | 63.33         | 90.54         | 38.02              |
| 5          | Jurkat cell-SELEX at Round 14         | R14-J     | GGACTCCT+TATCCTCT           | 10,652,725  | 3.04      | 95.03             | 4.97                   | 1,076          | 100           | 97.02         | 39.76              |
| 6          | Jurkat cell-SELEX at Round 15         | R15-J     | TAGGCATG+TATCCTCT           | 18,591,191  | 5.31      | 95.51             | 4.49                   | 1,878          | 100           | 96.85         | 39.7               |
| 7          | Purified T-cell SELEX at Round 15     | R15-T-SLX | GGACTCCT+TATCCTCT           | 11,340,437  | 3.18      | 94.93             | 5.07                   | 1,145          | 100           | 97.12         | 39.77              |
| 8          | Jurkat cell-SELEX at Round 16         | R16-J     | GGACTCCT+GCGTAAGA           | 9,994,449   | 2.82      | 95.53             | 4.47                   | 1,009          | 100           | 96.82         | 39.61              |
| 9          | LIGS-Jurkat-10nM Round 16 Library     | 10-CD28   | TCCTGAGC+TATCCTCT           | 10,586,615  | 2.98      | 95.33             | 4.67                   | 1,069          | 100           | 96.42         | 39.51              |
| 10         | LIGS-Jurkat-10nM Round 16 Library     | 10-OKT3   | CGTACTAG+TATCCTCT           | 15,339,339  | 4.32      | 95.17             | 4.83                   | 1,549          | 100           | 96.26         | 39.46              |
| 11         | LIGS-Jurkat-10nM Round 16 Library     | 10-UCHT1  | AGGCAGAA+TATCCTCT           | 13,373,005  | 3.77      | 95.1              | 4.9                    | 1,351          | 100           | 96.52         | 39.52              |
| 12         | LIGS-Jurkat-10nM Round 16 Library     | 10-iso    | TAAGGCGA+TATCCTCT           | 12,567,693  | 3.54      | 95.62             | 4.38                   | 1,269          | 100           | 96.62         | 39.58              |
| 13         | LIGS-Jurkat-20nM Round 16 Library     | 20-CD28   | TCCTGAGC+AGAGTAGA           | 24,273,135  | 6.84      | 95.1              | 4.9                    | 2,452          | 100           | 95.82         | 39.33              |
| 14         | LIGS-Jurkat-20nM Round 16 Library     | 20-OKT3   | CGTACTAG+AGAGTAGA           | 20,769,041  | 5.85      | 94.82             | 5.18                   | 2,098          | 100           | 95.45         | 39.22              |
| 15         | LIGS-Jurkat-20nM Round 16 Library     | 20-UCHT1  | AGGCAGAA+AGAGTAGA           | 18,728,168  | 5.28      | 94.53             | 5.47                   | 1,892          | 100           | 95.74         | 39.29              |
| 16         | LIGS-Jurkat-20nM Round 16 Library     | 20-iso    | TAAGGCGA+AGAGTAGA           | 21,420,810  | 6.04      | 95.03             | 4.97                   | 2,164          | 100           | 96            | 39.39              |
| 17         | LIGS-Jurkat-40nM Round 16 Library     | 40-CD28   | TCCTGAGC+TATCCTCT           | 11,523,741  | 3.29      | 94.57             | 5.43                   | 1,164          | 100           | 96.37         | 39.57              |
| 18         | LIGS-Jurkat-40nM Round 16 Library     | 40-OKT3   | CGTACTAG+TATCCTCT           | 27,773,873  | 7.93      | 95                | 5                      | 2,805          | 100           | 96.54         | 39.61              |
| 19         | LIGS-Jurkat-40nM Round 16 Library     | 40-UCHT1  | AGGCAGAA+TATCCTCT           | 8,640,907   | 2.47      | 94.26             | 5.74                   | 873            | 100           | 96.65         | 39.63              |
| 20         | LIGS-Jurkat-40nM Round 16 Library     | 40-iso    | TAAGGCGA+TATCCTCT           | 26,406,696  | 7.54      | 95.27             | 4.73                   | 2,667          | 100           | 96.76         | 39.69              |
| 21         | LIGS-Jurkat-80nM Round 16 Library     | 80-CD28   | TCCTGAGC+AGAGTAGA           | 23,794,452  | 6.8       | 94.74             | 5.26                   | 2,403          | 100           | 96.28         | 39.53              |
| 22         | LIGS-Jurkat-80nM Round 16 Library     | 80-OKT3   | CGTACTAG+AGAGTAGA           | 10,876,595  | 3.11      | 94.24             | 5.76                   | 1,099          | 100           | 96.06         | 39.47              |
| 23         | LIGS-Jurkat-80nM Round 16 Library     | 80-UCHT1  | AGGCAGAA+AGAGTAGA           | 10,497,609  | 3         | 94.34             | 5.66                   | 1,060          | 100           | 96.34         | 39.52              |
| 24         | LIGS-Jurkat-80nM Round 16 Library     | 80-iso    | TAAGGCGA+AGAGTAGA           | 18,732,468  | 5.35      | 94.7              | 5.3                    | 1,892          | 100           | 96.37         | 39.56              |
| 25         | LIGS-Purified T-cell Round 15 Library | T-CD28    | TCCTGAGC+AGAGTAGA           | 18,137,402  | 5.09      | 94.72             | 5.28                   | 1,832          | 100           | 96.47         | 39.57              |
| 26         | LIGS-Purified T-cell Round 15 Library | T-OKT3    | CGTACTAG+AGAGTAGA           | 17,532,868  | 4.92      | 94.71             | 5.29                   | 1,771          | 100           | 96.07         | 39.45              |
| 27         | LIGS-Purified T-cell Round 15 Library | T-R15-Lib | TAAGGCGA+AGAGTAGA           | 21,163,380  | 5.94      | 94.9              | 5.1                    | 2,138          | 100           | 96.55         | 39.59              |
| 28         | LIGS-Purified T-cell Round 15 Library | T-UCHT1   | AGGCAGAA+AGAGTAGA           | 16,736,291  | 4.7       | 94.43             | 5.57                   | 1,690          | 100           | 96.42         | 39.53              |
| 29         | LIGS-Jurkat-10nM Round 16 Library     | cap-CD28  | TCCTGAGC+TATCCTCT           | 17,057,479  | 4.79      | 95.11             | 4.89                   | 1,723          | 100           | 96.53         | 39.61              |
| 30         | LIGS-Jurkat-10nM Round 16 Library     | cap-OKT3  | CGTACTAG+TATCCTCT           | 18,305,330  | 5.14      | 95.06             | 4.94                   | 1,849          | 100           | 96.31         | 39.54              |
| 31         | LIGS-Jurkat-10nM Round 16 Library     | cap-UCHT1 | AGGCAGAA+TATCCTCT           | 17,650,650  | 4.95      | 94.89             | 5.11                   | 1,783          | 100           | 96.58         | 39.59              |
| 32         | LIGS-Jurkat-10nM Round 16 Library     | cap-iso   | TAAGGCGA+TATCCTCT           | 13,914,585  | 3.91      | 95.16             | 4.84                   | 1,405          | 100           | 96.54         | 39.61              |

**Table S2. Summary of results from FASTAptamer-Count for each library that has been sequenced.**

| Sample No. | Sample ID | Number of Unique Reads | Number of Total Reads | Diversity (unique/total) | Enrichment (1-diversity) | Percent Enrichment |
|------------|-----------|------------------------|-----------------------|--------------------------|--------------------------|--------------------|
| 1          | R7        | 14,041,300             | 18,944,225            | 0.741                    | 0.259                    | 25.9               |
| 2          | R9        | 12,892,067             | 37,677,052            | 0.342                    | 0.658                    | 65.8               |
| 3          | R12       | 3,950,975              | 22,260,603            | 0.177                    | 0.823                    | 82.3               |
| 4          | R13       | 6,214,461              | 38,328,982            | 0.162                    | 0.838                    | 83.8               |
| 5          | R14-J     | 1,604,366              | 9,422,736             | 0.17                     | 0.83                     | 83                 |
| 6          | R15-J     | 2,521,223              | 16,225,266            | 0.155                    | 0.845                    | 84.5               |
| 7          | R15-T-SLX | 1,303,190              | 9,948,080             | 0.13                     | 0.87                     | 87                 |
| 8          | R16-J     | 1,568,058              | 8,508,383             | 0.184                    | 0.816                    | 81.6               |
| 9          | 10-iso    | 1,824,881              | 10,710,622            | 0.17                     | 0.83                     | 83                 |
| 10         | 10-OKT3   | 2,117,980              | 12,859,911            | 0.164                    | 0.836                    | 83.6               |
| 11         | 10-UCHT1  | 1,888,849              | 11,339,221            | 0.166                    | 0.834                    | 83.4               |
| 12         | 10-CD28   | 1,609,903              | 8,947,893             | 0.179                    | 0.821                    | 82.1               |
| 13         | 20-iso    | 3,080,936              | 17,767,962            | 0.173                    | 0.827                    | 82.7               |
| 14         | 20-OKT3   | 3,007,195              | 16,818,767            | 0.178                    | 0.822                    | 82.2               |
| 15         | 20-UCHT1  | 2,806,662              | 15,286,542            | 0.183                    | 0.817                    | 81.7               |
| 16         | 20-CD28   | 3,446,074              | 19,985,695            | 0.172                    | 0.828                    | 82.8               |
| 17         | 40-iso    | 2,407,824              | 23,132,091            | 0.104                    | 0.896                    | 89.6               |
| 18         | 40-OKT3   | 2,461,688              | 24,053,144            | 0.102                    | 0.898                    | 89.8               |
| 19         | 40-UCHT1  | 1,104,291              | 7,496,012             | 0.147                    | 0.853                    | 85.3               |
| 20         | 40-CD28   | 1,372,050              | 9,946,198             | 0.137                    | 0.863                    | 86.3               |
| 21         | 80-iso    | 2,308,687              | 16,105,522            | 0.143                    | 0.857                    | 85.7               |
| 22         | 80-OKT3   | 1,565,887              | 9,210,755             | 0.17                     | 0.83                     | 83                 |
| 23         | 80-UCHT1  | 1,501,662              | 8,956,696             | 0.167                    | 0.833                    | 83.3               |
| 24         | 80-CD28   | 2,749,145              | 20,412,920            | 0.134                    | 0.866                    | 86.6               |
| 25         | cap-iso   | 2,001,019              | 12,006,585            | 0.166                    | 0.834                    | 83.4               |
| 26         | cap-OKT3  | 2,157,541              | 15,651,603            | 0.137                    | 0.863                    | 86.3               |
| 27         | cap-UCHT1 | 2,558,769              | 15,225,696            | 0.168                    | 0.832                    | 83.2               |
| 28         | cap-CD28  | 2,280,739              | 14,719,989            | 0.154                    | 0.846                    | 84.6               |
| 29         | T-R15-Lib | 1,872,596              | 18,020,697            | 0.103                    | 0.897                    | 89.7               |
| 30         | T-OKT3    | 1,633,305              | 14,634,645            | 0.111                    | 0.889                    | 88.9               |
| 31         | T-UCHT1   | 1,381,965              | 14,045,508            | 0.098                    | 0.902                    | 90.2               |
| 32         | T-CD28    | 1,351,403              | 15,486,441            | 0.087                    | 0.913                    | 91.3               |

**Table S3. List of 18 files obtained by FASTAptamer-Enrich and the summary of results obtained after filtering sequences on GALAXY.**

| Sample No. | File Name                         | No. of Total Lines | No. Kept After Filter $\geq 1$ RPM (x) | No. of Reads $\geq 4$ (z/y) |
|------------|-----------------------------------|--------------------|----------------------------------------|-----------------------------|
| 1          | R16-J_vs_10-iso_vs_10-OKT3        | 4,235,909          | 65,085                                 | 675                         |
| 2          | R16-J_vs_10-iso_vs_10-UCHT1       | 4,063,069          | 65,085                                 | 558                         |
| 3          | R16-J_vs_10-iso_vs_10-CD28        | 3,854,386          | 65,085                                 | 791                         |
| 4          | R16-J_vs_20-iso_vs_20-OKT3        | 5,829,736          | 65,085                                 | 180                         |
| 5          | R16-J_vs_20-iso_vs_20-UCHT1       | 5,683,346          | 65,085                                 | 231                         |
| 6          | R16-J_vs_20-iso_vs_20-CD28        | 6,178,433          | 65,085                                 | 189                         |
| 7          | R16-J_vs_40-iso_vs_40-OKT3        | 4,861,996          | 65,085                                 | 277                         |
| 8          | R16-J_vs_40-iso_vs_40-UCHT1       | 3,915,304          | 65,085                                 | 433                         |
| 9          | R16-J_vs_40-iso_vs_40-CD28        | 4,086,579          | 65,085                                 | 260                         |
| 10         | R16-J_vs_80-iso_vs_80-OKT3        | 4,137,852          | 65,085                                 | 309                         |
| 11         | R16-J_vs_80-iso_vs_80-UCHT1       | 4,093,159          | 65,085                                 | 337                         |
| 12         | R16-J_vs_80-iso_vs_80-CD28        | 5,012,917          | 65,085                                 | 238                         |
| 13         | R16-J_vs_cap-iso_vs_cap-OKT3      | 4,461,677          | 65,085                                 | 151                         |
| 14         | R16-J_vs_cap-iso_vs_cap-UCHT1     | 4,738,828          | 65,085                                 | 1,366                       |
| 15         | R16-J_vs_cap-iso_vs_cap-CD28      | 4,524,612          | 65,085                                 | 590                         |
| 16         | R15-T-SLX_vs_T-R15-Lib_vs_T-OKT3  | 3,694,766          | 42,182                                 | 130                         |
| 17         | R15-T-SLX_vs_T-R15-Lib_vs_T-UCHT1 | 3,513,520          | 42,182                                 | 81                          |
| 18         | R15-T-SLX_vs_T-R15-Lib_vs_T-CD28  | 3,489,135          | 42,182                                 | 110                         |



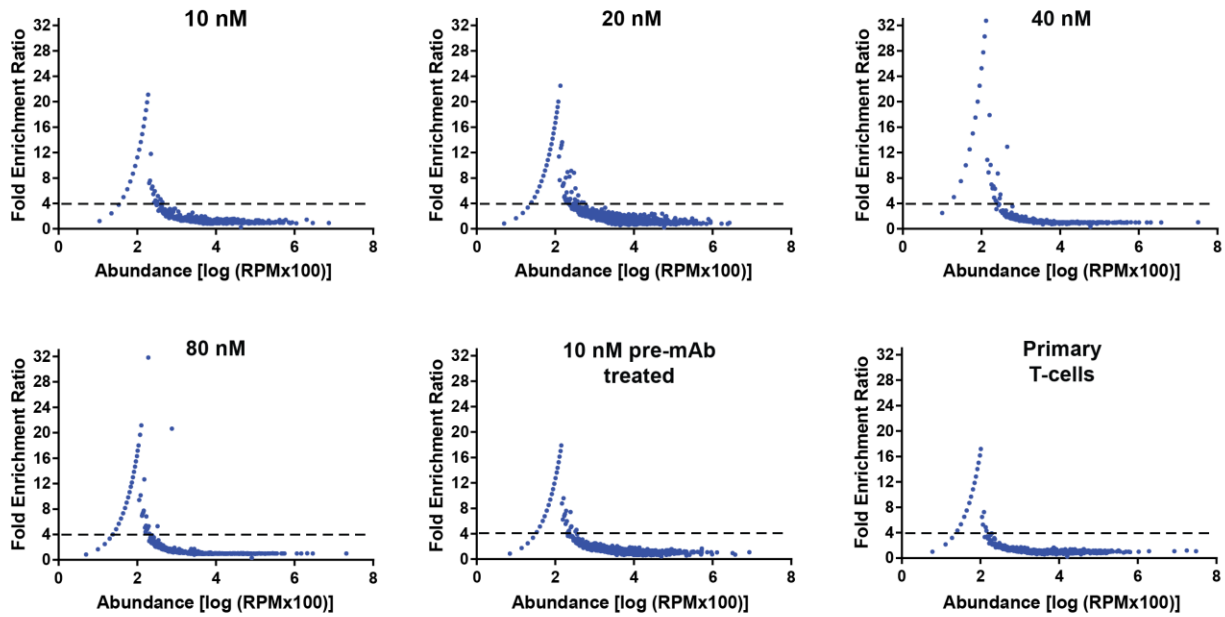

**Figure S4. Fold enrichment ratio vs. abundance plots for LIGS using anti-CD28 mAb.**

Fold enrichment ratios were obtained using the formula:  $(RPM_z/RPM_y)$  where  $z$  = anti-CD28 mAb and  $y$  = isotype control, and abundance values were obtained using:  $\log (RPM \times 100)$  for each sequence. A distinct population of sequences were observed above the fold enrichment value of 4 as shown by the dashed line.

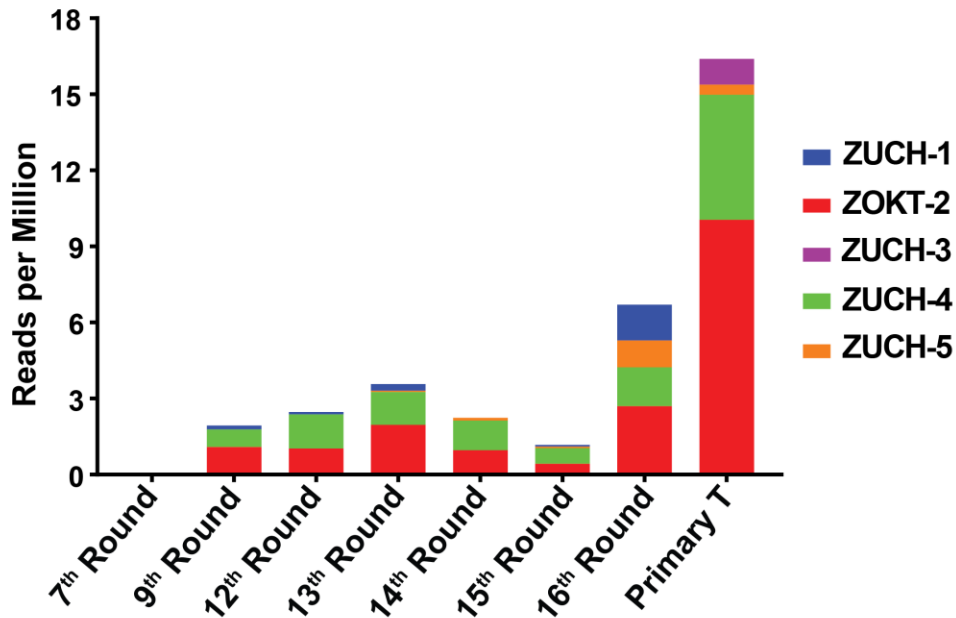

**Figure S5. The appearance of five aptamers during the progress of selection.**

Appearance of five aptamer sequences that are identified by LIGS were evaluated in each round of cell-SELEX that was sequenced. Normalized read counts (Reads per Million) on the Y-axis of each aptamer were obtained from FASTAptamer-Count data corresponding to each round of cell-SELEX. Starting from 9<sup>th</sup> round members of this family started to appear, and at 13<sup>th</sup> round of SELEX, all the members of this family were present with the exception of the ZUCH-3 aptamer. ZUCH-3 aptamer was identified from the LIGS experiment using primary T-cells and this sequence only appeared in the SELEX round after primary-T cells were incorporated.

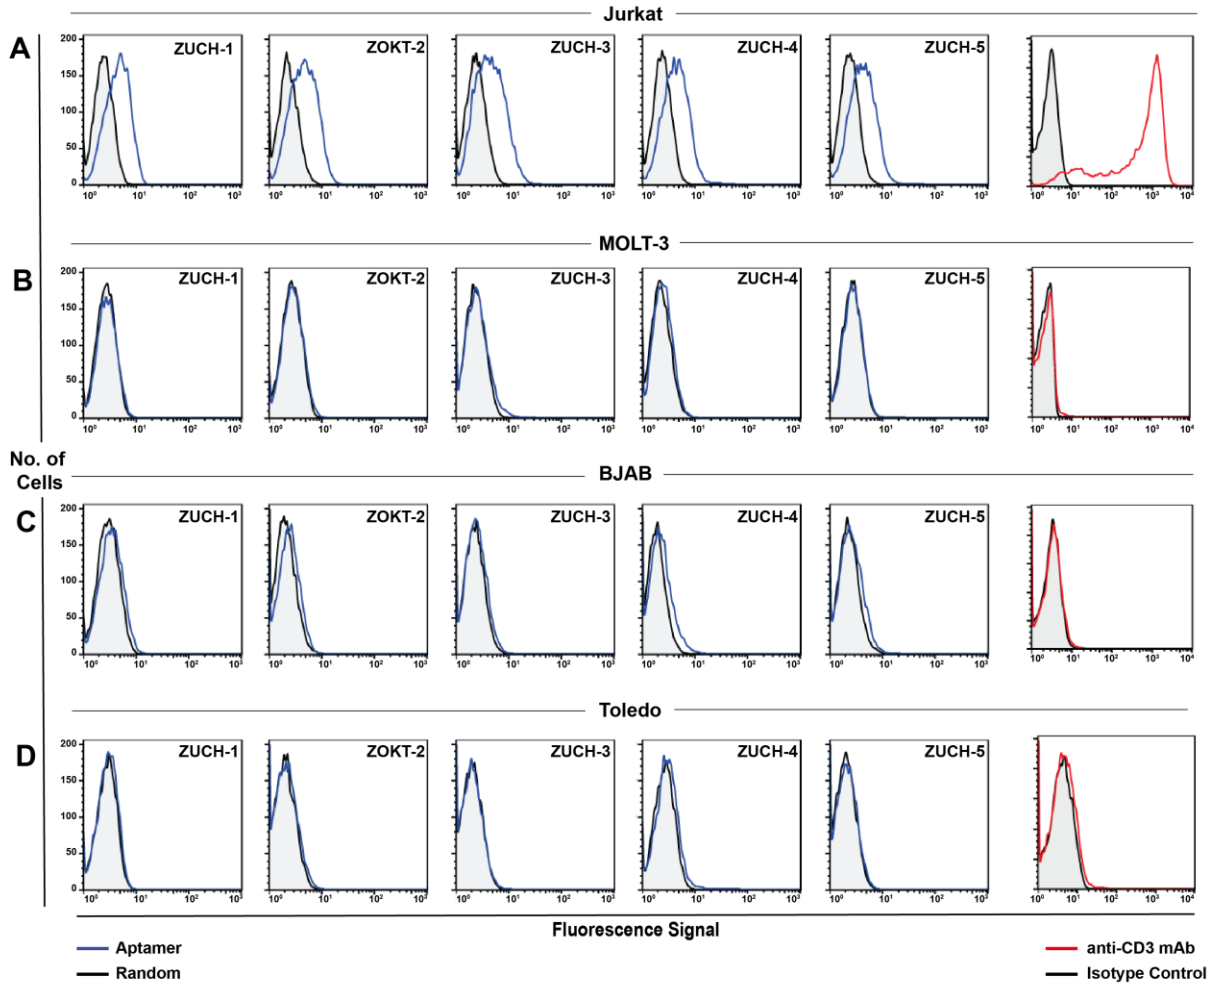

**Figure S6. Individual histograms from flow cytometric analysis of ZUCH-1, ZOKT-2, ZUCH-3, and ZUCH-4 and ZUCH-5 aptamers from figure 4A.** Binding of each aptamer (blue histograms) is evaluated against Jurkat.E6 (A), MOLT-3 (B), BJAB (C) and Toledo (D) cells. These assays were performed by incubating fluorophore-labeled aptamers or random ssDNA molecules with  $2.0 \times 10^5$  cells in a total volume of 100  $\mu$ L at 25  $^{\circ}$ C for 1 hr. After washing twice with 3 mL of RPMI, cells were reconstituted in 250  $\mu$ L of RPMI, and binding events were analyzed using flow cytometry (BD FACScan). Red histograms show anti-CD3 mAb staining for each cell line. All five aptamers showed specific binding against Jurkat.E6 cells (A) that express CD3 receptor (A, red histogram). No significant binding was observed against the control cell lines negative for CD3 (red histograms for B, C and D).

**Table S4. Summary of the LIGS conditions used to identify each aptamer discovered by LIGS along with the antibody that eluted each sequence and their apparent affinity values towards target Jurkat.E6 cells.**

| <b>Aptamer Name</b> | <b>LIGS Condition</b>                                         | <b>The Antibody used during LIGS</b> | <b>Apparent Dissociation Constant (K<sub>d</sub>)</b> |
|---------------------|---------------------------------------------------------------|--------------------------------------|-------------------------------------------------------|
| ZUCH-1              | 40 nM Round 16 Library without free ligands                   | UCHT1                                | 3.0 ± 0.48 nM                                         |
| ZOKT-2              | 10 nM Round 16 Library with free ligands                      | OKT3                                 | 16.1 ± 3.71 nM                                        |
| ZUCH-3              | LIGS against primary T cells                                  | UCHT1                                | 27.5 ± 5.86 nM                                        |
| ZUCH-4              | 20 nM Round 16 Library with free ligands                      | UCHT1                                | 52.5. ± 11.6 nM                                       |
| ZUCH-5              | 10 nM Round 16 Library against pre-mAb treated (capped) cells | UCHT1                                | 325 ± 62.7 nM                                         |
| ZOKT-6              | LIGS against primary T cells                                  | OKT3                                 | NA                                                    |
| ZUCH-7              | LIGS against primary T cells                                  | UCHT1                                | NA                                                    |
| ZUCH-8              | 20 nM Round 16 Library with free ligands                      | UCHT1                                | NA                                                    |

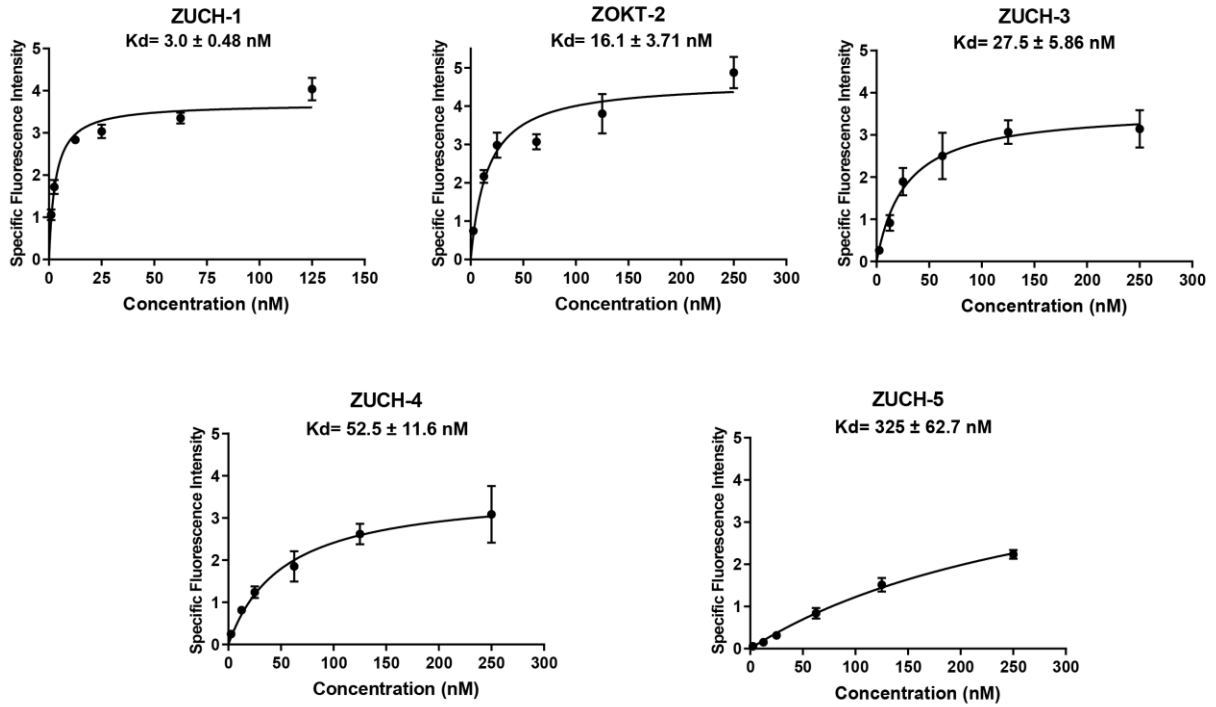

**Figure S7. Affinity analysis of ZUCH-1, ZOKT-2, ZUCH-3, ZUCH-4 and ZUCH-5 against Jurkat.E6 cells at 25 °C.** A range of fluorophore labeled aptamer and random DNA concentrations (1 nM to 250 nM) were incubated with  $2.0 \times 10^5$  Jurkat.E6 cells at 25 °C for 1 hr. Cells were then washed once using 3 mL of RPMI, and binding events were analyzed by flow cytometry (BD FACScan). These experiments were performed in triplicates for each aptamer. Apparent affinity values were obtained by plotting the specific median fluorescence intensities (Aptamer fluorescence intensity – Random DNA fluorescence intensity) against each concentration value on GraphPad Prism software based on the one-site specific binding model using the formula:  $Y = \frac{B_{max} * X}{(Kd + X)}$ .

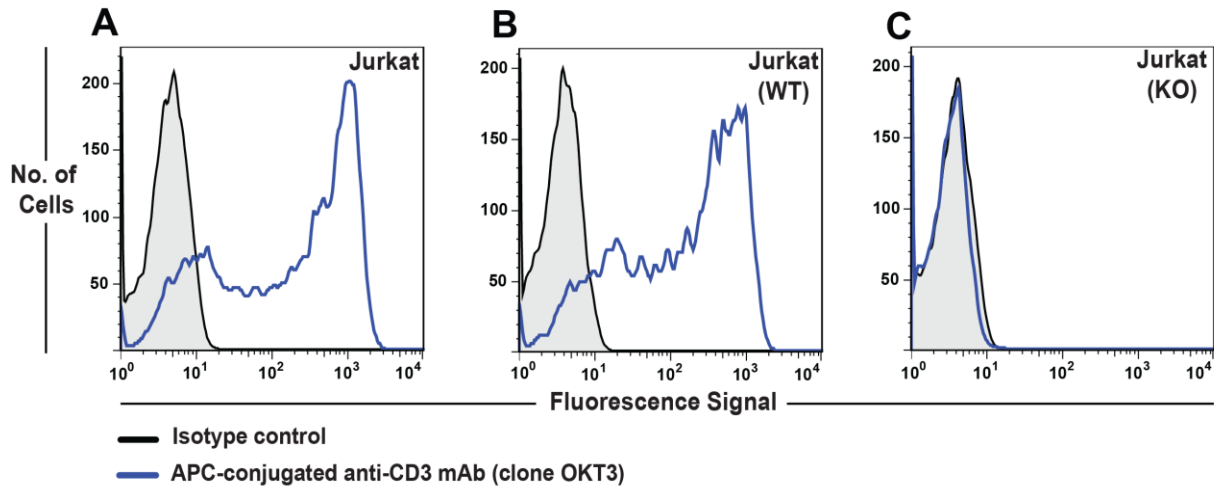

**Figure S8. Flow cytometry analysis of CD3 expression of cells used in specificity experiments involving knockout cells in Fig. 5A.** The Jurkat E.6 cells used in SELEX (A) and wild-type Jurkat cells used for generating CRISPR knockout cell lines (B) are positive for TCR-CD3 complex while the double knockout Jurkat cells obtained from Synthego do not express TCR-CD3 complex (C). These assays were performed by incubating  $1.0 \times 10^5$  of each cell type with  $5 \mu\text{L}$  of APC-conjugated anti-CD3 mAb (clone OKT3, eBioscience™, 17-0037-41) in a total volume of  $100 \mu\text{L}$  at  $25^\circ\text{C}$  for 30 min. The cells were then washed once with 3 mL RPMI, and the binding events were analyzed using flow cytometry (BD FACScan).

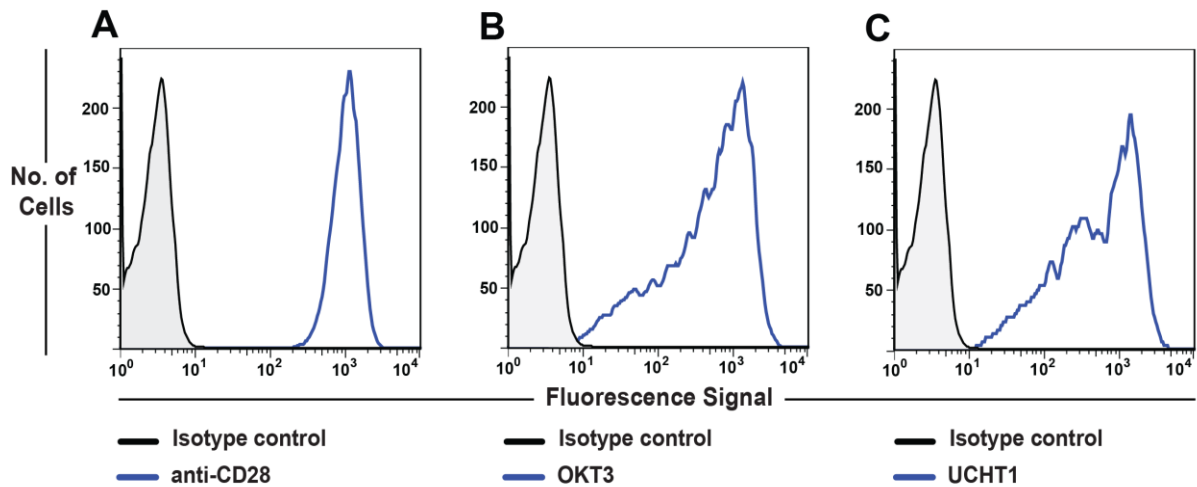

**Figure S9. Secondary antibody staining of Jurkat.E6 cells used for competitive binding assays in Fig. 5B.** Following the competitive binding assays, the same cells were secondary antibody stained using Alexa Fluor 647®-conjugated goat anti-mouse IgG at  $5 \mu\text{g}/\text{mL}$  final concentration for 30 min on ice and the binding was analyzed by flow cytometry (BD FACScan). Blue histograms showing binding of anti-CD28 mAb (A), OKT3 mAb (B) and the UCHT1 mAb (C) towards Jurkat.E6 cells.

**Multiple Sequence Alignment (CLUSTALW) of 485 Sequences Identified Based on Bioinformatics Analysis.**

```

10-UC-1.3_524 -----GGTCCCCCGTTACATTTATTC-CATTGGCTGTCTTGGG----- 37
40-UC-1.3_410 -----AGACCCCCCTGCATTTATAGGTATTGGCCG-CTTGTG----- 37
40-OK-1.3_253 -----ACCCCCCGTCGICT-TATCTTTTGGCCC-CGTGGATTG----- 37
80-OK-1.3_199 -----TGTGTTTTTTACGTTTTGCCCCCTTGTCTGTCTTGG----- 37
80-UC-1.3_290 -----TGTGTTTTTTACGTTTTGCCCCCTTGTCTGTCTTGG----- 37
cap-UC-1.3_1228 -----TGTGTTGTGTCCTCGTTGCGGCCCTTGTTTCA GTGTGTG----- 37
40-OK-1.3_167 -----TGTCCAACCCCAAGCGTAT-TGGTCTTTCCTTTG-CCCTTG----- 37
40-UC-1.3_157 -----TGTCCAACCCCAAGCGTAT-TGGTCTTTCCTTTG-CCCTTG----- 37
cap-OK-1.3_68 -----TGTCC-CGCCGTTTCTGAT-TCTCCTTTCCTTTGGTCCCTTGG----- 38
T-OK-1.3_87 -----AGTAGTTCAACCCCGGTTCTGATGTTCTTTTCTTGTT----- 38
cap-CD-1.3_160 -----TCGATGCCCCCGGTTCCCGTCTCTTCTTGTTTGTG----- 37
cap-OK-1.3_129 -----TCCCCCGTGAGTATTTTGCCCTTTTGTCTGTTGTTG----- 36
cap-UC-1.3_1275 -----TCCCCCGTGAGTATTTTGCCCTTTTGTCTGTTGTTG----- 36
40-UC-1.3_203 -----CGTCCCCCTAAATTTTGTTCCTGTTAGCC-TGTTGC----- 37
10-UC-1.3_226 -----TCCCTTGGTCCG-TTGTGT-TTGTGGTTGGCGCTGTGTC----- 37
40-UC-1.3_64 -----GTCCCTTATCCG-TTTCGTATTGTTGTGGCAGCTGCG----- 37
cap-UC-1.3_1311 -----GGCCCTTCATTCGCGGTTTGGTTTCTTGTCTAGCTGG----- 37
cap-CD-1.3_434 -----TGTGCCCTCAGTCG-GCTTGTGTTTGTTTTTTTGCTGG----- 37
40-UC-1.3_166 -----GCGCTGTCCCCCGTTAATGTAATTGGAGTTCGAATTG----- 37
cap-UC-1.3_82 -----TGTTCCCTGTCTAGTTGGTGTGATTTCGATGGTGTGG----- 38
80-UC-1.3_236 -----CGTCCCCCTTATTGTTGGCGAATGGACTTGGTTGTTG----- 38
cap-UC-1.3_695 -----TTGTCCCCTGTCTGTTGCG-GCCCGGTTTGGTTTCTGC----- 37
cap-UC-1.3_37 -----TCGGTCCCCTATGTGCGTTGATGGCTGTCTTTGGTGG----- 37
1.....10.....20.....30.....40.....50.....

```

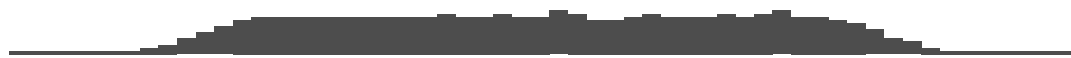

```

cap-UC-1.3_1043  -----TGTGCGTCCCCCGCGTGTGTTTGGTTGTGGTTTTTGGT----- 37
10-OK-1.3_173   -----TGGTGT-CTGTTTCCCCCGTCC-GCTTGGTCTTAATGTG----- 37
cap-UC-1.3_168   -----TGGTGT-CTGTTTCCCCCGTCC-GCTTGGTCTTAATGTG----- 37
10-UC-1.3_316   -----TTGGTGCCTATTACCCCCCGGT-TGGTGAAGCTGGTG----- 37
cap-UC-1.3_169   -----TGGTGACTTTTCTTCTCCGTTT-GTGTGGGT-ATGGG----- 37
cap-UC-1.3_628   -----AGTGGGGGTCTATTGCCTTCTCC--GTTCCGTGGTTGTG----- 37
10-CD-1.3_220   -----TGTGTGGGTCTCTTAGCGTTTCCGTGGGTATTGGTTG----- 37
10-OK-1.3_247   -----TTGGTTGAAATTCCTCCCTTCCAGTTGCCGCGGGGGTG----- 37
10-UC-1.3_93    -----TTGGTTGAAATTCCTCCCTTCCAGTTGCCGCGGGGGTG----- 37
40-UC-1.3_80    -----TGAAGTTGGGTTCTGCTTGTTC--TTGGCGTGTCCGGTGG----- 37
T-OK-1.3_11     -----GTGTTTTGTCA--TTCGCTTCTGCTGTTTCTGGGTGGG----- 37
T-UC-1.3_20     -----GTGTTTTGTCA--TTCGCTTCTGCTGTTTCTGGGTGGG----- 37
cap-UC-1.3_1164 -----TTGTTTGTGCGATTCTGCTTCCGTGGTCCGTGTTGG----- 37
10-OK-1.3_215   -----CGAACTGGTTGGGTTTAGTG-GGTTGCTAGTGGGGACG----- 37
10-UC-1.3_435   -----CGAACTGGTTGGGTTTAGTG-GGTTGCTAGTGGGGACG----- 37
20-UC-1.3_183   -----CGAACTGGGTTGGTTTAGTG-GGTTGCTAGTGGGGACG----- 37
40-UC-1.3_232   -----CGAACAGTGTGGGTTTAGTG-GGTTGCTAGTGGGGACG----- 37
20-OK-1.3_174   -----CGAACGGGGTTGGATTAGTG-GGTTGCTAGTGGGGACG----- 37
40-UC-1.3_329   -----CGAACGGGGTTGGTTTAGTG-GGTTGCCAGTGGGGACG----- 37
cap-UC-1.3_664   -----CGAACGGGATTGGTTTAGTG-GGTTGCTAGTGGGGACG----- 37
cap-UC-1.3_1339 -----CGAACGGGGTGGGTTTAGCG-GGCTGCTAGTGGGGACG----- 37
cap-UC-1.3_864   -----CGAACGGGGTAGGTTTAGTG-TGTTGCTAGTGGGGACG----- 37
20-UC-1.3_134   -----CAAAAGGGGTGGGTTTAGTG-GATTGCTAGTGGGGACG----- 37
1.....10.....20.....30.....40.....50.....

```

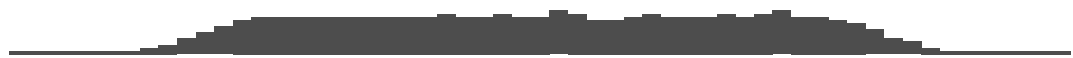



|                 |                                                    |    |
|-----------------|----------------------------------------------------|----|
| 20-UC-1.3_176   | -----CTAACGGGGTGGGTTTAGTG-GGTTGCTAGTGCGGACG-----   | 37 |
| 20-UC-1.3_91    | -----CGAACGGGGCGGGTTTAGTG-GGTTTCTAGTGGGGACG-----   | 37 |
| cap-UC-1.3_279  | -----CGAACGGGGCGGGTTTATTG-GGTTGCTAGTGGGGACG-----   | 37 |
| 10-OK-1.3_597   | -----CGAACGGGGTGGGTTTAGTG-GGTTGCTAGTGGGTA CT-----  | 37 |
| 10-CD-1.3_353   | -----CGAACGGGTTGGGTTTAGTG-GGTTGCTAGTGGGGACT-----   | 37 |
| 10-OK-1.3_121   | -----CGAACGGGGTGGGTTTAGTG-GTTTGCTAGTTGGGACG-----   | 37 |
| cap-UC-1.3_863  | -----CGAACGGGGTGGGTTTAGTG-GGTT CCTAGTGTGGACG-----  | 37 |
| cap-UC-1.3_1336 | -----CGAACGTGGTGGGTTTAGTT-GGTTGCTAGTGTGGACG-----   | 37 |
| T-UC-1.3_21     | -----CGAACGGGGTGGGTTTAGTG-GGTTGCTAGTGGGGGGG-----   | 37 |
| T-UC-1.3_70     | -----CGAACGGGGTGGGTT CAGTG-GGTTGCTAGTGGGGGCGG----- | 38 |
| cap-OK-1.3_50   | -----CGAACGGGGTGGGTTTAGTG-GGTTGCTAGTGGGGGACG-----  | 38 |
| T-OK-1.3_36     | -----CGAACGGGGTGGGTTTATTG-GGTTGCTAGTGGGGCGG-----   | 37 |
| T-UC-1.3_44     | -----CGAACGGGGTGGGTTTATTG-GGTTGCTAGTGGGACCG-----   | 37 |
| 10-CD-1.3_563   | -----CGAACGGGGTGGGTTTATTG-GGTTGCTATTGGGGACG-----   | 37 |
| T-UC-1.3_27     | -----AGGGGGGTGAGTTTAGTG-GGTTGCTAGTGGGGACG-----     | 35 |
| T-CD-1.3_11     | -----AGGGGGGTGGGTTTAGTG-GGTTGCTAGTGAGGACG-----     | 35 |
| T-UC-1.3_24     | -----CCGTGGGGTGGGTTTAGTG-GATTGCTAGTGGGGACG-----    | 36 |
| T-UC-1.3_23     | -----CCGTGGGGTGGGTTTAGTG-GGTTGCTAGTG-GGACG-----    | 35 |
| 80-UC-1.3_312   | -----AGGGGTGTGGGTTTAGTGC GGTTGTCTAATGGGACCG-----   | 37 |
| 10-CD-1.3_586   | -----AGGGGGGTGGGTTCTAGTGC GGTTTTCTAAGGGGACCG-----  | 37 |
| 20-OK-1.3_177   | -----AGTGGGGTGTGTTTAGTGC GGTTGTCTAAGGGGACCG-----   | 37 |
| T-OK-1.3_88     | -----AGGGGGGTGGGTTTAGTGCTGTTGTCTAAGGGGGCGG-----    | 37 |
| 40-OK-1.3_83    | -----CGCCAAGATGGGATTCTGTTGGGTAAGTGTGGAAG-----      | 37 |

1.....10.....20.....30.....40.....50.....

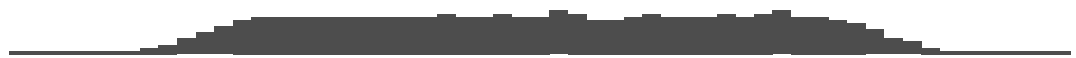

```

40-UC-1.3_109      -----CGCCAAGATGGGATTCTGTGGTTGGGTAAGTGTGGAAG----- 37
cap-UC-1.3_1083   -----CGCCAAGAGGGGATTCTGGGGTTGGGTAAGTGTGGAAC----- 37
T-OK-1.3_80       -----CGCCAAGAGGGGATTCTGTGGTTGGGTAAGTGGGGACG----- 37
20-UC-1.3_210     -----TGGTTCCTTCGTCTGTGTTCAAGTTGCTTCTATTGGGGG----- 37
cap-UC-1.3_1289   -----GTGTGTTTTCTCGTTATGTCCAGG---CGTGTATTGGGGG----- 37
cap-UC-1.3_1346   -----ATGGGGTTTGTGCGTTGTTTTAGTG---GTGATATTGGCG----- 37
cap-UC-1.3_404    -----CGGGTTCAGTGGGGCTGCCG---GCTATTGGTCTTTATGG----- 37
cap-UC-1.3_1326   -----CTGGGTTTGTGGGTGTGATC---GCTATTGGAATTTCTGG----- 37
cap-UC-1.3_869    -----ATCGGGTCCCTT--TCGTGC-----TTCTGGTT-GTGTGGCTTTTG- 37
cap-UC-1.3_1362   -----CTCGGTTTCTTCGTTGTGCAA---TATTGGTTCGTTTGGC----- 37
10-OK-1.3_349     -----CTGAGTTCGGTCTAG--GGGGTATAATTGGTCTGTCCG----- 36
cap-UC-1.3_1240   -----TGGGGTCTGTTCTTTTCGGGGATGTTCTGGTCTTTTG----- 37
10-UC-1.3_422     -----GCGGTGTTCTATAATTT-CGGGGG-GGTATTGCTTTAAGG----- 37
cap-UC-1.3_1105   -----TGTTCTTTCTCTGCGTGGGTGGTATTGGCTTTATTTCG----- 37
10-UC-1.3_497     -----TTGTTTCATTGCGTGTGGGTTTGTGGTTTTTCTGTC----- 37
10-CD-1.3_207     -----TTGGATTCTTTCTGGGGGGGTTT-TGGTCGGTCATGT----- 37
cap-UC-1.3_1175   -----TTGGTTCATCGTGCTGGGTTCATAGGGGTATTGGTGT----- 37
10-CD-1.3_21      -----TTGGTTCCTGCTGGGCTTTATTTTGGGTATTGGGGG----- 37
cap-UC-1.3_721    -----GTGTTTCATGTGCTGGTTTACGTTGGGGTATTGGCTGG----- 38
80-OK-1.3_123     -----TGTCTTTCTTTCCTGGGT-CGTGTGGGTGTTGGGACGC----- 37
10-UC-1.3_311     -----TTGTAGTCTGCGCGGGTC-GTTGGTATTGGTCA GTGTG----- 37
cap-UC-1.3_749    -----TTGTGTTGCGGGGT--GGTGGTATTGGGTGTTGTGCCCC- 37
40-OK-1.3_81      -----GATCT--CTTCGTGCGGGTA-TATGTGGTTGTCA GTCATG----- 38
1.....10.....20.....30.....40.....50.....

```



|                 |                                                        |    |
|-----------------|--------------------------------------------------------|----|
| 10-CD-1.3_629   | -----GATGTAATGTCGTCGCGGGT--TAT-TGGTTGT-GGTCTCG-----    | 37 |
| 20-UC-1.3_212   | -----TGC GTTCTTTATTCGATGCTG---GGGGCTGTTGG--TTGGC-----  | 37 |
| cap-UC-1.3_1160 | -----TTTTGTTCGAAAACGTGCGGGGGTTATTGGATTGG-----          | 36 |
| 80-UC-1.3_178   | -----TTGGTCTGTTTATTCGTTGAAAG---CGGGGTATTGGCGT-----     | 37 |
| cap-UC-1.3_556  | -----TGTCTGCTGTTTATGCATCGTGG---GGGGTATTGGGTCTG-----    | 37 |
| cap-OK-1.3_8    | -----TTGGTCTTGGAAATGCTCTGGTG---GGATATTGTGTTGCG-----    | 37 |
| cap-UC-1.3_1185 | -----TTGGTCTTGGAAATGCTCTGGTG---GGATATTGTGTTGCG-----    | 37 |
| cap-UC-1.3_1230 | -----TGTGGTCC-TTTGTTTGTGTCGGG---GGGTGTATTGGTTC-----    | 37 |
| cap-UC-1.3_495  | -----TGGTTGATATTTCTGTTCTGCGGGGGGGCTATTGTTG-----        | 37 |
| cap-UC-1.3_1166 | -----TTGTTGTTTATGG-CGTCCCGGGGGATATTGTCTGGTC-----       | 36 |
| 20-UC-1.3_172   | -----GGTTATTAGTCTCGCT---TGTGGGGGCCAAATTGTCTCGGG-----   | 38 |
| cap-UC-1.3_564  | -----TGCTTTTCGTTTCTGTTCTGCTGCTGTGTTGGG---GCTTGTGG----- | 37 |
| cap-UC-1.3_644  | -----TTGTCGTTTGTTCGCGCGGGGTGGGGTTGTGCTTGTG-----        | 37 |
| 20-UC-1.3_162   | -----TGAATGGTTTGTAT---TGCTGGGGGT-ATTGGAGGCTTGGG-----   | 37 |
| cap-UC-1.3_1341 | -----CCCGTTCGTATCC-TATTGGTGCTCAGTGGGGCCCTGC-----       | 37 |
| 40-UC-1.3_173   | -----GTTGTTT--TCCATGC-TGTGTTCTGCTCTTTGTGGGTGG-----     | 37 |
| 40-UC-1.3_212   | -----TGGTTGATTGGTCCGT-C-TGTGGTGGGGTATTGGAGGT-----      | 37 |
| cap-UC-1.3_773  | -----TTGGCGCCGTTCTGTTGATTG-CGTGTGTGGGTTTGTG-----       | 37 |
| 40-CD-1.3_233   | -----TGTTTTCGCGCGTTT-T-TTGTTCGTTCTTGGATGGGTTGG-----    | 37 |
| cap-UC-1.3_765  | -----TTGGGTTTCGTTCT--GGC-TGCGTCGGGTA--TCTGGGCGG--      | 37 |
| cap-UC-1.3_1197 | -----TTGGCTTTCTCTTT--TGCGTGGTTCGATTAGTTCTGGG-----      | 37 |
| 10-OK-1.3_540   | -----TCCCTGGGTTGTGTTAT--GTGTGAGTGCGGTTATTGTC-----      | 37 |
| cap-UC-1.3_49   | -----TTGGGTTTCTTTGTGTGATTTGTGGTGGATCTGCTTG-----        | 37 |

1.....10.....20.....30.....40.....50.....



```

cap-UC-1.3_574 -----TCTCGGTTTCTTTCT-TTCTTGGTGGTGGTTCTTGTTG----- 37
cap-UC-1.3_540 -----TTCTTGCTTTGGTCTGTCCTTTGGGGTTTTTTGTGGG----- 37
cap-UC-1.3_978 -----TGCTTCTCTCTGTC-TCTTGTGGGATTCTGCGGGGGG----- 37
cap-UC-1.3_817 -----TCTGATTCTGGTTTGTGGGATTA--ATGGGGTG-GGTTG----- 38
cap-UC-1.3_1174 -----TTGTTTGTGGCTGTGATGTGGTGTGGTTCTGC----- 37
10-UC-1.3_332 -----TTGCTGTCTG-CGTCGTT--GTGGGTTTGGTATCCGTTG----- 37
10-UC-1.3_522 -----GTCTGTCGTTCTGTCGTC--TCTGTGTGTGGTATTGTTTGG----- 37
cap-UC-1.3_746 -----TTGTTGTTTTAGTCGTCGTC--TCTGTGGGGTTCTTGG----- 38
cap-UC-1.3_971 -----TTGTTGTTCTCATTCTGTCGTC--TCTGTGGGGTTCTTGG----- 38
cap-UC-1.3_585 -----GTTGGTCTGTCTTCGGT--GTGTGGCGGGTATTGCGTTG----- 37
10-CD-1.3_223 -----TGTGGTCCGTCCG-GTT--GGGGCTCCGGTATTTTGTTTGG----- 38
cap-UC-1.3_1143 -----CCCCATTGTTGGCCCGGCTGTGTGTGCGTGTGTTG----- 37
40-CD-1.3_193 -----CGTCCCCTTTGTGTTTCTTTCTTGGCTTGTGTGGC----- 37
cap-UC-1.3_1284 -----GTTGTCTCGGTCTGTGGTT--TGTGTGGGTTATGCTCTG----- 37
cap-UC-1.3_96 -----GTGCTTTCTGTCCGTCTGTGTTTCTGTTCGGTGTG----- 37
cap-UC-1.3_116 -----TGTTCGTTCTTTTCG-CTGGTTTT-CGTTCCGTTGTGC----- 37
cap-OK-1.3_26 -----TCTTTTTCTCTCCGGGGGGT-TCTTGGGCTGTGTTCTG----- 37
cap-UC-1.3_1236 -----TGTCCCTC-TCTTTGTGGT-CTCCGGCGCTTGGTCCCTG----- 37
T-OK-1.3_44 -----TCCGTCTGTGTGTGGTACTCCCCCTGTTG--CCCTGCCC----- 38
10-OK-1.3_49 -----TGTCTGTTGGTGTGTCTGTGTTCCCGTTGGTATCCGG----- 37
10-OK-1.3_323 -----TAACTCGGTCTGT-GTGTGTTCTGATTGGTGTATGGG----- 36
40-OK-1.3_41 -----CCGCCCTGTGTAGA-TTG--TC-TGTCCGCTG-TTGGTC----- 35
40-UC-1.3_111 -----CCGCCCTGTGTAGA-TTG--TC-TGTCCGCTG-TTGGTC----- 35
1.....10.....20.....30.....40.....50.....

```



```

cap-UC-1.3_331      -----TTGCGTGTGTAGTCTTG---TG-TGCTGTCTGGTTGGTTTG-      37
cap-UC-1.3_1293    -----GTGGT-TGTGTGTAT-GTGC--C--TGGGGTCTGTTTCTTTC--      37
cap-UC-1.3_1186    -----TTGGTCTGTGTGTATTGTTTCG--TG-TGGGGTCTGTATGT-----      37
cap-UC-1.3_1040    -----TGTGTGGGTTGTTTTCCGGCTC-TGTGGTCTGTTTCTGT---      37
cap-UC-1.3_988     -----GCGTGGTTCGT-TGTGTGGTTC---TA-TGTCCCCTGTGTCTG---      38
10-OK-1.3_330     -----GTGTCTCGTGGCTTCTCTGTTTCTGTTTCCGGTGTGG-----      37
10-UC-1.3_380     -----TCGTGTTCTGTGGCTTTGTGTTCTCCGGTGGGGTGT-----      37
cap-UC-1.3_870     -----AGTCTGTTCCGTGGCCCGTTGTGTGTTTCTGTCTGCTGG-----      37
cap-UC-1.3_933     -----GTTTGTCTGTTCTGTCCGGTGTG-GTTTCTTTGCTTGGG-----      37
40-OK-1.3_188     -----TGTTCTGTCTGGTG--TCGTGTGT-TGTTTGTGCCTGC-----      36
40-CD-1.3_142     -----GTGTGTCCGTGATGATCTGTGGGT-TGTTTTTTCCTGG-----      37
cap-UC-1.3_56      -----TGTTGTTCTGTGGTTGTATGTTTGGGTTGCTTCCTGG-----      37
T-OK-1.3_108      -----CTGTTTCCGTGGTGTGTTGTCTGTTTGTGTTTCTTTTCTG-----      37
10-OK-1.3_593     ---CGGTCCC-TGTGAATCCC-GTGGCG--TTGGTTTGTGTTG-----      37
10-UC-1.3_260     ---CGGTCCC-TGTGAATCCC-GTGGCG--TTGGTTTGTGTTG-----      37
cap-UC-1.3_1112    ---TGTTCCGTGTCTGCTTCC-GTTGTC--GTG-TTTGTTTTTG-----      37
10-UC-1.3_183     -TTGGGGTCCGTGT---TCTG-CTGGAG--TGTAATTGTTGTCG-----      37
10-UC-1.3_143     -CTCTTGTGGTTCC-TTTGCG-CTGGGGTGGCTGTCT-CG-----      37
cap-UC-1.3_693     -----TTGTCTGTTCTGTCTGCTCTGGGGTTGTCGTTTTCG-----      37
cap-UC-1.3_539     -----TTGCCGGTTCG-TTGGTGCCTGGTGTTCCTGTTGGCG-----      36
cap-UC-1.3_936     -----GTGTGTTCTCCTTTCTATGCGGTGGGGTTCGTTGTGG-----      37
cap-UC-1.3_1044    ---TGTGAA GTGTGTGCTCTCCGGTC-TGTGGT---TTCGGTTGA-----      38
10-UC-1.3_478     -----ATGCATACTCACGCGTCCGGGTTCCGTAGTCAAGGTGG-----      37
1.....10.....20.....30.....40.....50.....

```



```

cap-UC-1.3_566 -----TGCTCTTGTTCCGTGATTTGGTGGTTGCTTTTTGG----- 37
cap-CD-1.3_102 -----TCCGTTGGTCCGTTTCGTCATTGGGGTTTCCGTATTG----- 37
cap-UC-1.3_871 -----AGGATTGTCCACGCG-GTATTGGGTATGCATTGATGG----- 37
cap-UC-1.3_1202 -----TTGGATCGTCCGTGTGCAATGTTGGGGCTGCTTTTTTTG----- 37
20-OK-1.3_137 -----TTGGCTAATGTTGGTTCTGTCTGTGTTCCGGGTTGTTGC----- 37
40-UC-1.3_40 -----TTGGATAAAGTG-TGGGTGTTGGCTGTTAGTTTGTGTTG----- 37
cap-UC-1.3_815 -----TCTGGGTT--CGTGGGCTTTGTTTC-CTTTTGGGGTGTG----- 37
10-CD-1.3_408 -----TTGGGTTGCTGTGGGTTGTTCTGTCGCGTTTGGGCTGG----- 37
cap-UC-1.3_522 -----TTGGGTTACTGTTGC-TCTGGGTCGCGTCTTGTGTTGGT----- 37
cap-UC-1.3_1190 -----TTGGGTTCTGTGGGG-TAATGTTGGTGTCTCATCGTGTG----- 37
cap-UC-1.3_323 -----TTGGGTCCTCTGTGTG-GTTTCGTCTGGTCTTATTTTGG----- 37
10-OK-1.3_159 -----TGTGTTCTTTTTGCTGC--GGGTGTTTGTTCCTTTGCGGG----- 37
10-UC-1.3_347 -----TGTGTTCTTTTTGCTGC--GGGTGTTTGTTCCTTTGCGGG----- 37
cap-OK-1.3_107 -----TGTGTTGTTCTTGTGTTG--GGGTGTTG--TCTTTGTTGGCT----- 37
cap-UC-1.3_546 -----TGTGTTGTTCTTGTGTTG--GGGTGTTG--TCTTTGTTGGCT----- 37
80-OK-1.3_127 -----TCTCTGTGGTTTCTGGATTC--GGGGTTTTCTTTTTTG----- 37
80-UC-1.3_72 -----TCTCTGTGGTTTCTGGATTC--GGGGTTTTCTTTTTTG----- 37
20-UC-1.3_27 -----GTGGGGTGTCTGTGTTTCTGGGGCGTCTTTTTTG----- 37
10-UC-1.3_463 -----GCGCTGTGGTGTGTTCCAATTC-CGGGGTCTTGTGTTTG----- 38
cap-UC-1.3_1235 -----TGTCTGTGTG-CTGTTAC-CGGGGTCTTGTATTGCTGG----- 37
20-UC-1.3_221 -----CGTGCTCTG-TTTCGGGGTCTTGTGTTCTTTCGGGG----- 37
T-UC-1.3_81 -----TTGCT-TG-TGGTGGGTTCTAGTTCTTGTGTTCTGTTGG----- 36
cap-UC-1.3_837 -----GTGCTGTG-TTGTGTTCTGTTATTGGTGTGCTTGGGG----- 37
1.....10.....20.....30.....40.....50.....

```



|                 |                                                      |    |
|-----------------|------------------------------------------------------|----|
| cap-UC-1.3_613  | -----CTGTGGGTCGATTGTGGGTTTGTAT-TCCTGGCGGG-----       | 36 |
| cap-UC-1.3_812  | -----TCTTCTATGGTTCG-TTTCGCGGGGGGAT-TTTTGGCG-----     | 37 |
| cap-UC-1.3_1053 | -----TGCGGTTGTGTTTCGGGGGTTTTTTTGTCTTGGTTGGG-----     | 37 |
| 10-OK-1.3_482   | -----TGTTCTCTTTGCTGGGTGTTGGTTTTCTGTTGGTTGC-----      | 37 |
| 10-UC-1.3_344   | -----TGTTCTCTTTGCTGGGTGTTGGTTTTCTGTTGGTTGC-----      | 37 |
| 40-OK-1.3_189   | -----TGTCCTTCGTGGTGCCTTTTTCTGTCTGGTGGCTGGGG-----     | 37 |
| cap-UC-1.3_594  | -----GTCTCGTTTTGTGG-GTGTTTTTTT-TCTGGTGGCTGGG-----    | 36 |
| 80-OK-1.3_140   | -----TTGTGTGTTTCGTGCGGTGTGTGTCCTTTTCAAGTGGC-----     | 37 |
| cap-UC-1.3_1206 | -----TTGCGGGTGGTTGTTGGGTGTTGTTTTTATGTGGC-----        | 37 |
| 40-UC-1.3_364   | -----GTTCTGTGCTTTCCGGTGGT-TGTTTGTCTTGTAGTGG-----     | 37 |
| 40-UC-1.3_121   | -----TTATGTTCTGTTGT--TGTGTGT-TTGCTGGATGTGCTTG-----   | 37 |
| cap-UC-1.3_783  | -----TTATGTTCTGTTGT--TGTGTGT-TTGCTGGATGTGCTTG-----   | 37 |
| T-OK-1.3_106    | -----GGTTGTTCTGTGCTGC--TTTGTGTGTTTCTGGATGTGG-----    | 37 |
| cap-UC-1.3_653  | -----TGTTTCTGGTCTGTTCTG-TGTGGGTAATGCTTTAATTTGGT----- | 37 |
| cap-UC-1.3_339  | -----TGTTTCTGGTCTGTTCTG-TGTGGGTAATGCTTTAATTTGGT----- | 37 |
| cap-UC-1.3_782  | -----TTCCTGGTTTTCTCGGTTGTGCGT-TGGGTTTCTGTTG-----     | 37 |
| cap-UC-1.3_468  | -----TCTCTGCTTATCTT-TGTGTGGGGGGT-CTA-TTTGTCTG-----   | 37 |
| cap-UC-1.3_537  | -----TTGCTTGTCTTTCTGTGCCGGGTGT-TTACTTTGTTTGG-----    | 37 |
| 20-OK-1.3_62    | -----TTGGTGTCTATCCTGTATCGCTTCTTGTCTGTGGCGGG-----     | 38 |
| cap-UC-1.3_181  | -----TCTGGTTGTTATC--ATGTCGCGTCTGTCTTTGGGTGGG-----    | 37 |
| 10-UC-1.3_196   | -----TGTTGCT-GTGTG-CCGGTGTACTAAATTGTGTGTGGG-----     | 37 |
| cap-UC-1.3_1147 | -----TGTTGCT-GTGTATCCGTTCTCAATTTTTCTGTGGGGG-----     | 37 |
| cap-UC-1.3_1037 | -----TGTGTTGTTTGTTCGATCGG-GTCTTCTTTTGTTTGG-----      | 37 |

1.....10.....20.....30.....40.....50.....



```

10-OK-1.3_609 -----ATGCGTGTGTGTGTGCTTCT-GCTTTTTCGGGGTGGG----- 37
cap-UC-1.3_1242 -----TGCTTGTTTCGCTGTGTGTCTCGTTTTGTGGGGCGGG----- 37
10-OK-1.3_449 -----TTGGTGAT-TAGTTGTTTGTTCCTCGGGTTTCTTGCGGG----- 37
cap-UC-1.3_1301 -----GTGATGTTATTGTTT-TGTGTGGGTTATTGGCGGCGGG----- 37
10-UC-1.3_337 -----TTCG-GGT-GTGTGTTGTTGTGTGGTCTCTTCTGTTATG----- 37
cap-UC-1.3_541 -----TTCGTGGT-GTGTGTTTTCGGG-AGTGTTTCTGGTTTTG----- 37
cap-OK-1.3_117 -----TGGT-GTGTGTAATGTGTGTCT-TGGCTGGTATTGTGTC----- 37
cap-UC-1.3_1114 -----TCTGGT-GTTTCGTGCTCAAGGGTGTCTCTGGTGTTTTG----- 38
cap-UC-1.3_1315 -----GCGCGTTCGGGGT-GTGTCTTGTGTGGGTATATTGTCC----- 37
cap-UC-1.3_1213 -----TTCGTGGTTGTTGTCTGTGGGGTCTATTTTCAAGG----- 36
cap-UC-1.3_780 -----TTCGTGGGTGTGTTTC---TGGGTCTATTGTCTGCTCTGGG----- 37
20-UC-1.3_12 -----CTGTGTTCTGTGATGTCTGCCTTGTGGGTTTTTGGGG----- 37
10-UC-1.3_529 -----GCGAGTGTGTAGTGCTTTCTCCTTGGTCTTTGTGGG----- 37
cap-UC-1.3_946 -----CTAGTTG-TGT-GTGTGTG-TATGTCTGTCTTATGGGGGG----- 37
T-UC-1.3_28 -----TTGTTGCTGA-TTGTGTGCTGTGTCTTTTTTCATTGTGG----- 37
40-OK-1.3_272 -----ATGTGTGTGTGTGGGGTGTGTATTGGGTCTCTTGTCT----- 37
cap-UC-1.3_1308 -----GGTATTGTGTTTCTTTTTCGGT---ATTGGGT-TCATGTGC----- 37
cap-UC-1.3_241 -----TGTCCGTGGCGCGGGTTTTTTCTTGGCTGTGTTGGG----- 37
cap-UC-1.3_1262 -----TCTGCGGCGTTGTGGAATTGTCTATTGGTC-TATTGGGT----- 37
T-OK-1.3_73 -----TGTGTGTGTCCGTTTGTCTGTTCTTGGGTTTTTGTGGC----- 37
T-UC-1.3_12 -----TGTGTGTGTCCGTTTGTCTGTTCTTGGGTTTTTGTGGC----- 37
cap-UC-1.3_159 -----TGTGTGTG---GTCTGGCGT-CTTGTGTTTTTGTCTGTGTG--- 37
cap-UC-1.3_1305 -----GTATGT-CGTGTCTCTTTCGT-GGGGTGTTTTGGTCC----- 37
1.....10.....20.....30.....40.....50.....

```





```

cap-UC-1.3_1217 -----TTATGTGTGTGGCTGTCTTTCGT-ATTGGGTGCTTCTC----- 37
cap-UC-1.3_277 -----CTCTGGGGTCTGGCTTTCTTGGTTTTTGTTCGGG----- 35
cap-UC-1.3_1321 -----CTTTCGTGGGCCG--TTTATTGGTGTTTTGTTCGGGTG----- 37
cap-UC-1.3_1168 -----TTGTGTGGGGTG-TG-AATAGCTTTTTGGTGGGGTCCG----- 38
10-CD-1.3_211 -----TTGCGTGGGGTT-TCTGGTTGGCTCTTGGTTTCCGTT----- 37
20-OK-1.3_54 -----GTTAGTTTGGTGCTGTGGGTTTATTGGTCTTTGCGG----- 37
20-UC-1.3_73 -----GTTAGTTTGGTGCTGTGGGTTTATTGGTCTTTGCGG----- 37
40-OK-1.3_28 -----TGGGCTCTGTTTGTCT--TG--TCCTGCTGGGTTTTCTGG----- 37
cap-UC-1.3_1260 -----TCTGGCGCTCTTGTCT--TGGTTCTCTGCTGGGTTGG----- 37
cap-UC-1.3_301 -----GTCAAATTTGTGCTCTGGGT--GTTG--TCTTTTTGTGTT----- 37
cap-UC-1.3_677 -----TCGTGACCCGGGTTTGTG--TTTTGGCTGTGTTCCCC----- 37
10-OK-1.3_492 -----TGTGGTATCCTGGG-TTG-TCTG--CGTCTGTTTATGGGTG----- 37
cap-UC-1.3_179 -----TGAATGCTCTGGG-TCT-TATGTTCCTTTGTATTTGGGG----- 37
20-UC-1.3_154 -----TGTGCTCTGGGGTGT-TCCTCGTTTTTATGGCTGGGG----- 37
cap-UC-1.3_1263 -----TCGTTCTTGGGTTGTGTGTGCGCTTTTTTGGGTGGC----- 37
10-CD-1.3_376 -----TTGTGTTCTTGGGGCTGT-TATG-GTTTTGTTGTGCTGC----- 37
10-OK-1.3_252 -----TTGGGTTGC-ATCATGTTTTGTTTGTGGGTATTGTTG----- 37
10-UC-1.3_321 -----TTGGGTTGC-ATCATGTTTTGTTTGTGGGTATTGTTG----- 37
10-CD-1.3_696 -----TTGGGGTGTATCCTGGGCTGTGTGTGATTGTTGTTG----- 37
cap-UC-1.3_396 -----GCGGTGGGTTGCTTCGTGGTTGTGATTGGTCTTTG----- 37
cap-UC-1.3_710 -----TGCGGTGGGT--CTTCGGTGTTTTGTGTTGG-CTTTGTTG----- 37
10-OK-1.3_431 -----TTGTGTGCTGGGGTCT-TGGGCTTTAATCCGTGTTGT----- 37
cap-UC-1.3_1249 -----TGCCTGGGGTGTCTTCGGTTTAGTCTGGTTTTTGT----- 37
1.....10.....20.....30.....40.....50.....

```



|                 |                                                    |    |
|-----------------|----------------------------------------------------|----|
| 40-OK-1.3_39    | -----TCTGGGGTCCCTTACTCTTTATTGCGTCTTTCTTGTC-----    | 37 |
| T-OK-1.3_109    | -----CTCGGGGTTTTCTTACGGTTGGT-GCTTCTTTGGTCTG-----   | 37 |
| cap-UC-1.3_1327 | -----CTCTGTGGGGCTTT-CTCGTTGTTGTGCTGGTTGTCTG-----   | 37 |
| 10-UC-1.3_390   | -----TCCGGGGTCTCTTTGGTTGTTTTTTCTTCGTCTGCTG-----    | 36 |
| 40-UC-1.3_297   | -----CCCCAGCCGGTAAGTATCTCGTTGTTCT-CCTCTTCTTC-----  | 38 |
| 40-UC-1.3_144   | -----CTGCGGTTTGT-TTTTGTGGTTCCCTGGTCTGTGGC-----     | 37 |
| cap-UC-1.3_593  | -----GTCTGCGGCTC--TGTGTTGGTTGTCAATGGTCTGTGTG-----  | 37 |
| cap-UC-1.3_785  | -----TGTTTCGGCTCTGGGATGTT-GTTTCTCTGTTT-TGTGG-----  | 37 |
| T-OK-1.3_19     | -----GTTCCGGTGTCCGGTTGTTTGTGCTGTGCTTCTGTG-----     | 37 |
| 40-OK-1.3_75    | -----TTCGGTGGTGGG-TAATTGGTGTTTTGCTT-TGTGATGG-----  | 37 |
| 10-OK-1.3_184   | ----TCGCGTGGTCCCTGGTCCCTCTTTGGCTTAT--CTGGTTTG----- | 37 |
| 40-UC-1.3_79    | -----TGCTGGTCCCTTTTGCCTTTTTCACTGGTTTGTGTC-----     | 37 |
| 10-UC-1.3_355   | -----TGTGTTGTGGCTTTGTTTTGTCTTGGTTTGTGGCTGTGG-----  | 37 |
| 10-OK-1.3_245   | -----TTGTGGTCTCGTTCTGTTCTTGGTTTTCTGGGCTGGG-----    | 37 |
| cap-UC-1.3_528  | -----TTGGGTGTTCCCTTTCTGTTGGGCTTTTCTATGCGGG-----    | 37 |
| cap-UC-1.3_750  | -----TTGTGTGTTGTTGTTTTCGGGTGTCCTTTTTTCCGG-----     | 37 |
| 10-CD-1.3_383   | -----TTGTGGTGGTTCGTGCTTGGTTGGGCTATTGGCTGG-----     | 37 |
| 10-OK-1.3_171   | -----TGTCTGTCTCTGGTCCCTTTTTATTCTGCGGTGGTGGAA-----  | 37 |
| cap-UC-1.3_1234 | -----TGTCTTCTGTGTTG--TGCTTGTTATGGTCTGGCGGTGG-----  | 37 |
| 10-OK-1.3_527   | -----TCGTGTCCCTGTGGGTTCTGTTTGTCTGGGTGTGTG-----     | 37 |
| cap-UC-1.3_246  | -----TCTTGTGCT-TGTTGTTGTGATGCGGGGGTGGTTG-----      | 36 |
| 10-OK-1.3_508   | -----TGCTCTGGCTGTGACCTTGTCTCTCTGGTGTGGGG-----      | 37 |
| cap-UC-1.3_360  | -----TGCTCTGGCTGTGACCTTGTCTCTCTGGTGTGGGG-----      | 37 |

1.....10.....20.....30.....40.....50.....



|                 |                                                                                              |    |
|-----------------|----------------------------------------------------------------------------------------------|----|
| cap-CD-1.3_172  | -----GGGTTTTGGC-GTGT <b>CA</b> TGGTGTCTGTCTT <b>GAA</b> TGGGG-----                           | 38 |
| 20-UC-1.3_34    | -----TTGGT <b>A</b> GTGTCC <b>T</b> GTTTGTGTGGTCTT--CGCTCGGGGG-----                          | 37 |
| cap-UC-1.3_764  | -----TTGGT <b>A</b> GTGTCC <b>T</b> GTTTGTGTGGTCTT--CGCTCGGGGG-----                          | 37 |
| 10-UC-1.3_313   | -----TTGGTTGTGTCTCGT <b>GAT</b> CC <b>T</b> GGT <b>AA</b> T--TGCCGCGGGG-----                 | 37 |
| 40-CD-1.3_245   | ----- <b>A</b> GGTGTGTCC <b>C</b> TGCTT <b>CA</b> TGTTCTT <b>CG</b> TGCC <b>CC</b> GGGG----- | 37 |
| 10-UC-1.3_358   | -----TGTG <b>CG</b> TGTGGCTTTTTTT <b>TG</b> CG <b>A</b> TTCTGGTTCTGGG-----                   | 37 |
| cap-UC-1.3_691  | -----TTGTG-GTGT <b>TG</b> CTGTTTTT <b>G</b> CTGTTCTGGTT <b>CC</b> GTG-----                   | 37 |
| 20-OK-1.3_89    | -----G <b>CT</b> GGGTGGCTTCTTTTTCT <b>CG</b> T <b>AT</b> TGT-CGGTGGGG-----                   | 36 |
| cap-UC-1.3_1258 | -----TCTGTGGGGTCTTTG <b>C</b> TTCTGGT <b>ATA</b> CTGTTGTGGGG-----                            | 37 |
| 10-OK-1.3_649   | -----T <b>CT</b> GGGTT <b>A</b> TTTGCTTTTTCTTGGTTCTCTGGTGTGG-----                            | 37 |
| 20-OK-1.3_150   | -----TTGGTTTGTGT <b>GAT</b> G--TCGGTTC-CGCGGG <b>A</b> TTGGGTC-----                          | 37 |
| cap-UC-1.3_757  | -----TTGGTTTGT <b>AT</b> GTCT--TGTGTTT-CGGTGG <b>A</b> TTGGCTGC-----                         | 38 |
| cap-UC-1.3_479  | -----GTGGGTTGTTTGGCT--TTTCTTTTTCTTTGG <b>A</b> TTGG <b>C</b> G-----                          | 37 |
| cap-UC-1.3_1187 | -----TTGGTCTGTGGGTT <b>GA</b> ATTGGTTTTCTTCTGTTGG <b>C</b> GG-----                           | 37 |
| 20-CD-1.3_50    | -----TTGGTCTGTGGGTT <b>GA</b> ATTGGTTTTCTTCTGTTGG <b>C</b> GG-----                           | 37 |
| cap-UC-1.3_1198 | -----TTGG-CTGTCTGTT <b>C</b> ATT--GTTTCTGGT <b>AT</b> TGT <b>CG</b> G <b>A</b> TG-----       | 37 |
| 10-OK-1.3_652   | -----TCGTGTGTGTGTTTCCGGCTGTGTTTCTCCTGTGGGG-----                                              | 37 |
| cap-UC-1.3_223  | -----TTGGTTCGTGCTCGT-TTCCGGGGGTGGCTG-CCTGTGG-----                                            | 38 |
| cap-UC-1.3_447  | -----TCGGGTT <b>CA</b> TTCTTCTCGTGTCTCTGTTGCTGTGGG-----                                      | 36 |
| cap-UC-1.3_501  | -----TTTCGGGTGTGGTGTTTTCCGGTCTCTCTTTTCTGTGG-----                                             | 37 |
| cap-UC-1.3_260  | ----GTGCTCTCGGGTCCGC-GTCC <b>CC</b> TTCTCTCTCGGGTGG-----                                     | 38 |
| cap-UC-1.3_659  | --GGGTTCTGT <b>CG</b> GGT---- <b>A</b> TTGTCTTCTTT <b>CG</b> GGTTG-----                      | 37 |
| cap-CD-1.3_415  | -----TTG <b>A</b> T <b>CG</b> GGTCTT-GCC <b>CC</b> TT <b>CA</b> TTTCTGCGGGTGTGG-----         | 37 |

1.....10.....20.....30.....40.....50.....



```

cap-UC-1.3_17      -----GTGGCGTCATCGTGTGGGGTATTGCTTC----T-CGGTCGG----- 37
cap-UC-1.3_1310    -----GGCGTCAT-----GGGGTATCTTTTC----TTCGTTTCGGTGGTTG-- 37
10-OK-1.3_255      -----TTGGC-TCAT-----GGTGTACTTTTTTGCGTTTTGTTTCGGGG----- 37
cap-UC-1.3_1218    ---TTATGCGGTCTGGGGTCTGTGGGGTTATTTTTC----TTTG----- 37
10-CD-1.3_592      -ACTAGTGGGGTCTGA--TCTGTGGGGT-GTTCTTC----TGTGTG----- 38
cap-UC-1.3_895     TACTCGGGGGTCCTGG---TGTGCGCTTTTTTTTG----TTTGC----- 37
40-UC-1.3_349      -----TAA GCGTCAA-TCGGGGGGCCGTATT----TTTGTTCTGG----- 37
cap-UC-1.3_872     -----TGAA-TGGGGGGTATTGGTATT----CTTGTTATCGTCTTGG-- 37
cap-UC-1.3_709     -----TGCTTTTCAT-TCTGTGGTTTTGCTGTTA---TTCGTTCTGG----- 37
cap-UC-1.3_1266    -----TCGTGTCAC-TCT-TGGTTTGCGGGTTA---TTC-TTCTGGGG----- 37
cap-UC-1.3_865     -----CCGTCGGGTG---GGTCTAGTGT--GGATGTTTCGGGGACGG----- 37
T-UC-1.3_55        -----CCATGGGGTG---GGTCTAGTGT--GGATGTTTCGGGGACCG----- 37
10-OK-1.3_598      -----CCTTGGGGTG---GGTCTAGTGT--GGATGTTTCGGGGGCTG----- 37
T-OK-1.3_83        -----CCGTGGGGTG---GGTCTAGTGT--GGATGTTTCGTTG----- 33
40-UC-1.3_28       -----CCGCGGGGGTG---GGTCTAGTGT--GGATGTTTAGGGGGCGG----- 37
20-UC-1.3_84       -----CTGTGGTGTG---GGTCTAGTGT--GGATGTTTCGGGGGCGG----- 37
20-UC-1.3_185      -----CCGTGGTGTG---GGTCTAGTGT--GTATGTTTCGGGGGCGG----- 37
T-UC-1.3_52        -----CCGTGGGGTG---GGTCTAGTGT--GGATGTTTCGTTG----- 33
T-OK-1.3_35        -----GTGTGGGGTGTCTGGTCTGGTGTGTTTGTATGTTTTTAG----- 37
cap-UC-1.3_1024    -----TTGGGGTT---TGTATGGTTCGGGGGTTTTGTTCTGTTCTGC----- 38
cap-UC-1.3_1319    -----GAGGTG---GGTATCGTCGTGGGGTATTGGT-GTTATGTAC----- 37
20-UC-1.3_216      -----GTGTGGGGTG---AATATTGT---GGGTTTTTGT-GTTCTGTG----- 37
10-OK-1.3_536      -----TCGCGTGGGGGTC-AATTTGTAGTGGTTGTCTGATTATG----- 37
1.....10.....20.....30.....40.....50.....

```



|                 |                                                     |    |
|-----------------|-----------------------------------------------------|----|
| 10-CD-1.3_253   | -----TCGCGTGGGGGCCCATATGTTTTG-TTGTCGTTTTGTG-----    | 37 |
| cap-UC-1.3_1095 | -----TTGTTTCGCGGGGGGGTATATTCTTCATG-TGGTTGTGG-----   | 37 |
| 40-OK-1.3_227   | --CAGGGGGTCCTGCGGGTGGGCTT--ATTGTTGATGGTTCG-----     | 38 |
| 40-UC-1.3_17    | --CAGGGGGTCCTGCGGGTGGGCTT--ATTGTTGATGGTTCG-----     | 38 |
| 10-CD-1.3_768   | -----TGTTCCGCCGGGGGGCCCTTCATTGTTG-TGCTTCTG-----     | 36 |
| cap-UC-1.3_811  | ---TGAAGCGTCTGGGGGGGG-TA--TTGTAGTATTTAGTTTG-----    | 37 |
| cap-UC-1.3_1333 | -----CGGCGTCCGGGGGGGGATA--TTGCTGT-TTTATTGTGCG-----  | 37 |
| 20-UC-1.3_215   | -----TCCGTCCGGGGGTCTTCGTTTGTGGTGTGTGTTG-----        | 37 |
| 40-OK-1.3_54    | --TTTAGTTTCGCGGGGGGGTTTGTGGATGTTTATGCG-----         | 37 |
| 40-UC-1.3_11    | --TTTAGTTTCGCGGGGGGGTTTGTGGATGTTTATGCG-----         | 37 |
| cap-UC-1.3_1036 | -----TTACGCGGGTGGGGTTGTCTGGATTTTATGTTTGTGCG-----    | 37 |
| 40-OK-1.3_82    | -----CGTATCCTGGG-GGGTCTGTTCTGTTCTTTTTCTTTTTG-----   | 37 |
| 40-UC-1.3_108   | -----CGTATCCTGGG-GGGTCTGTTCTGTTCTTTTTCTTTTTG-----   | 37 |
| cap-UC-1.3_1074 | -----GCTCGTGGG-GGGT-TGTTCTGTTTTTTTTTGTGTTGCG-----   | 35 |
| 10-OK-1.3_513   | ----TGCGCTGTGGTGGGTTG-TTAAATTGGTTTTTCTGTTTGT-----   | 37 |
| cap-UC-1.3_1051 | ----TGGGTTGTTGTGGGTT--TGTTTTGTTATGGCGTTTGTG-----    | 37 |
| cap-UC-1.3_531  | ---TTGGGCTGCGGTGGAAATGGTCTGGGTATTGGTTTGTCC-----     | 37 |
| cap-UC-1.3_945  | -----CTGCGGTGGG-----GGCTATTGGCTTATCTAAATATGGGC----- | 37 |
| 10-UC-1.3_140   | -----GCGGGGAGGTGGGTTAGTATTGGGCTGTCTTATTTCG-----     | 37 |
| cap-UC-1.3_604  | -----GCTGGCGGGTGAATTGAGTATTGGACTGTCTCTTGGG-----     | 37 |
| 20-UC-1.3_69    | -----TTGGGGGTGTAATTGGCTTCTCTTCTAGTCGTGGGCGG---      | 37 |
| cap-UC-1.3_1001 | -----TTGGGCG-GTGT--GCTTCTTTCGTATTGGCGGGTCTATG       | 37 |
| 80-UC-1.3_138   | -----TTGGGGTGTGGTGTTCGGATTGGCCGCGTGTGTG---          | 36 |

1.....10.....20.....30.....40.....50.....

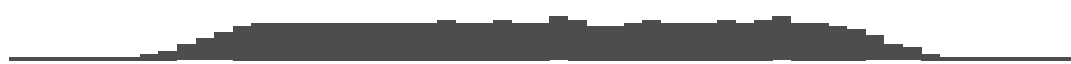

```

cap-UC-1.3_390 -----GGTCGAGTTCGGGGGTG-GGTATT-GGATCGCCTTCGTG----- 37
cap-OK-1.3_65 -----TTG-GCGGAATGGGGGCTGTTGAACGG--ATTGGATGGTC----- 37
10-CD-1.3_510 -----TAGCGTGGAATGTAGGGGGGTATTGGC--ATTGGTTGTG----- 37
cap-UC-1.3_860 -----CTCTGAGGGGGATGTGGTGTTCGCT-ATTGGATAATTG----- 37
cap-UC-1.3_1140 -----ACG-GGGGGCATATAATTGGACTTCCTTTTGCTGGTGTG----- 37
10-CD-1.3_352 -----CTAGTATGCGGGGGGGGATAATTGGACTA---TTTGCTGG----- 36
cap-UC-1.3_377 -----TAGCGCGGGGGGATAATTGTCTTG--TTTATGGGAATGTG---- 37
cap-CD-1.3_527 -----AGTGTTTGGGGGATAATTGGTCTGTC-TTTTTCGGATTG----- 37
cap-UC-1.3_349 -----TGTCTGGGGTGGGTATTGTATTG--TGTTCTGGTTGTA----- 37
cap-UC-1.3_993 -----ATTCTGCTGTACAGGG-GGCTATTGGATT---GTTCTGGTG----- 37
10-CD-1.3_299 -----CAGCGAGATCTGGGGGCTATTGGGTT---TTTATTGGCGG----- 37
10-CD-1.3_399 -----TTGGTTAGGTCTGGGG-CTATTGGACT---AGTCTTGGGG----- 37
10-OK-1.3_457 -----TTGGGTTCCGTCTCTGCGTTCGTGGTTGCTTCTGTC----- 36
10-UC-1.3_181 -----TTGGGTTCCGTCTCTGCGTTCGTGGTTGCTTCTGTC----- 36
cap-UC-1.3_848 -----GGGGTCCCTCGCCGCGGT-GTATTGGTTCGTTTCTG----- 36
cap-UC-1.3_234 -----TTCGGTCCTTCTCTGGGGGGTATTGCATCTTTCGTGG----- 37
cap-UC-1.3_1100 -----TTGGGCCCTCAC-GTGCGGGATTGGATCTTTCGTTGGC----- 37
10-UC-1.3_322 -----TTGGGTTATTTTCGCATGGGGGGTATTGTGAAGGTG----- 36
10-CD-1.3_540 -----GGGGCTATTATCGC-TGGGGGGTGTGGGACTGTTTCTG----- 37
20-UC-1.3_123 -----TTGGCGTATTTTGTCTGGTGGGGTTTGTTCATGTGGG----- 37
40-UC-1.3_87 -----TTGGCGTGTATCTTCGGGGGGGAAATAGTTTTTTTATG----- 37
cap-UC-1.3_380 -----GTTACTATGGCGCCCGGGTAT-TGGAGGTTTATATGG----- 36
cap-UC-1.3_612 -----GATCTTCTTACTTTTCGCGGGGTAT-TGGGGTTTATGTC----- 37
1.....10.....20.....30.....40.....50.....

```



```

cap-UC-1.3_466 -----TTGACGCGCGGGGAATCTATGGGGGTTTGGACTATTG----- 37
cap-UC-1.3_851 -----GGATTTTCGCGGGGGGTTTGGGCCGA-TATTGGCGGC----- 36
cap-UC-1.3_850 -----GGATTTTCGCGGGGGGTTTGGGCTGA-TATTGCGGC----- 36
cap-UC-1.3_1343 -----CATTGGCAGGGGGATTCTTTGGGCTATTGGCGGCTTA----- 37
cap-UC-1.3_608 -----GCGGGGGGATCGCTGGGGTATTGGTTCCTGTATCGG---- 37
cap-UC-1.3_1192 -----TTGGGGTTCGCTTGGTCCGGGGTCTTTTCTCTGT-TCGG---- 37
cap-UC-1.3_614 -----CTGTGCGGGGACACTGGGGGGTATTGTTTCTCTGG----- 37
10-UC-1.3_312 -----TTGGTTTATGCG--GGGGTATTGTTGTTTCAGTTGCGT----- 37
10-CD-1.3_401 -----TTGGTGTATTCGCTGGGGGGTGTGTTCTCTGACTTGC----- 37
cap-UC-1.3_822 -----TCGGGTCAATGGGTTTTAGCGGGGGGTTGTTTTCTTTG----- 37
cap-CD-1.3_416 -----TTGATCCGGGGTTTTGTGGGGTGGTTGTGCTTCTGC----- 37
20-UC-1.3_208 -----TTCTCTGCGGCTGTCTGTTGGGGGTGT--TTGCTTTCTCG----- 37
40-OK-1.3_110 -----TTGTGTTGATTTCTGTTGGGGGGGATCTTCCCTTCTC----- 37
cap-UC-1.3_555 -----TGTCTGC-GCC-TGGGGTTTGGGGTCTCTTATTTCTGC----- 37
cap-UC-1.3_1261 -----TCTGC-GGTGTGGTGTGTTGGTGTTCGCTCTTTTCTGGG----- 37
cap-UC-1.3_740 -----ATGTTCCGTGGTCTGCTGG-GT--CTTGTTCGTATTGGCTG----- 37
cap-UC-1.3_1035 -----TTCCCTGTTTCTTGG-CTGGCTCTGTGGTTTGGCTG----- 36
10-UC-1.3_289 -----TTGCCTGTGTGTTG--TGGTCCGGTAGTTCTCGTTCTGG----- 37
40-OK-1.3_122 -----GTTTT-TGTTTCGCGGTCTGGGGATTGTTGTTGCGTTG----- 37
40-UC-1.3_101 -----GTTTT-TGTTTCGCGGTCTGGGGATTGTTGTTGCGTTG----- 37
cap-UC-1.3_1219 -----TGTTTCGTGTGGCAGGGTATAAGGGGGTA-TTGTCTG----- 37
40-OK-1.3_71 -----GTGTGTGCTTGGTTTATGGTTGTTGTTT-GTATTG-GTGG----- 38
cap-UC-1.3_1089 -----ATGTGCTCTGGTGGTGGT-GTTGCTCTGTATTGTGTGG----- 37
1.....10.....20.....30.....40.....50.....

```



```

cap-UC-1.3_121 -----TGCGGGTGGTGGGTCAATTGGCAGTATTC--TCTTG-GTG----- 37
80-CD-1.3_132 -----GGGGTGTTCGGTTGGGGGCTCTTGCAAG--TATTG-GCGTG----- 37
cap-UC-1.3_835 -----GTGGGTGGGGGGATATTGGTCAGTATTT--CGTCG-TTGG----- 37
cap-UC-1.3_799 -----TGGTGTGGCTGGGTGGGTATTG-TTGCAATTG--CGTCG-G----- 37
cap-UC-1.3_392 -----GGGGGAAATGTGTGGGTATTGCGTTCTTCTT--TGTGGG----- 37
cap-UC-1.3_1231 -----TGTGGGTCCGTGGGGGTATTGCTCTTGTTCG--TGTAAG----- 37
10-OK-1.3_510 -----TGCGTGTCTGTTGGGTTATTGTATT-CTTGTGTATGGGG----- 37
cap-UC-1.3_676 -----TGCTTGCCGTGCCCTTTGTTGTCTT-TCTTCGTGTCTGG----- 37
cap-UC-1.3_1041 -----TGTGTGCTGGGGGTGGGTTTTCTTGTTCCTCTCGTGTG----- 37
10-UC-1.3_421 -----GCTGTGTGGGGGT-CGTGTTGCTTTCTTTGTTCTCTGG----- 37
cap-UC-1.3_280 -----CAGTGGGGGTCTTCGGGTTTTGGTATTCTGTTTGTTCG----- 37
cap-UC-1.3_858 -----CTGCATGTGGGGGCCCTCTTG-TCTTTTGTATTGTTGGG----- 37
cap-CD-1.3_288 -----GTGCGGGTTGGGGGTCTCTTGGTCTTTTCTTTCTTCG----- 37
10-UC-1.3_553 -----TTGGTCTGTGGGTGTTCTCGTT--TTACTTTTCGCTG----- 36
cap-UC-1.3_1099 -----TTGGGTCTGCCGTGGGTGTGGTTCAATTCCTTCGCG----- 37
cap-UC-1.3_582 -----GTTTGGGGTCTGTGG--TTCTGCTTTTTTTTTCTTTCGG----- 37
10-CD-1.3_748 -----CGTGGGGTCCGTGGG-GTTCTGGCTATTTTCGTCTGTG----- 37
cap-UC-1.3_821 -----TCGGGTGTC-TGGTCTAGTT-CTCTTTTGTGGGGTGGC----- 37
10-CD-1.3_500 -----TCGGCTGTTGTTACTCTTGTGCTTTTTTTGAGGGGG----- 37
10-UC-1.3_433 -----CGTGGTGTGGTTTCGTTTCTGCTTCTCTGGGGGTGC----- 37
cap-UC-1.3_876 -----CTTCCGGGGGCTGTTGGT-TATTTTCACTTATTGTTGG----- 37
cap-UC-1.3_338 -----TTAGCGCGGGGTGTGGTGGTCTATTCTCTTTTCG----- 36
cap-UC-1.3_1070 -----GGTGTGGTGTCCCTGGTCTGTTTCTTTTTTTCGCGGGG----- 37
1.....10.....20.....30.....40.....50.....

```





```

cap-UC-1.3_1179 -----TTGGTGTGTGTTGTTGGTCTTCTCTTCGTGGTGTG----- 37
cap-UC-1.3_394 -----GCTGGGTTGTCTGTGTTGTGGTGT-CGTCTTTTCTTGG----- 37
cap-UC-1.3_1203 -----TTGCTGGGTT---TGTTGTGGCTTTTCGAGTTGTCTTGGG----- 37
cap-UC-1.3_1306 -----GTAGTCCC GGGTGTGTTGATGTCCTCTAATTTGCCTG----- 38
10-CD-1.3_639 -----TTGGCCCGTCTGTGTTG-TGCTGGTCCATTTTCCCGTCG----- 38
20-OK-1.3_173 -----CTGCTGTTGTGTGG-GGTTCTT--ACT---TCTTCTGGGGGGG----- 37
10-CD-1.3_524 -----GTGTCGTGTCTGTGGTCTT--AATAATATTGTCTGGGGGG----- 37
cap-UC-1.3_1270 -----TCGCCGGG-GGTCTTC--AAT-TAATATCCGGGGCTTTTCG-- 37
cap-UC-1.3_225 -----TTGGGGTCTGCTGTTTCT-TGTTCTCCTGTTCCGGG----- 36
cap-UC-1.3_732 -----GGTTGTCTGTTCTGTGTCTTCT-TGTTCTCCTGTTCCGGG----- 37
cap-UC-1.3_802 -----TGCTGTTTGTGGTGGTCTTCTGTGTGCTTCTTGTGTTG----- 38
cap-UC-1.3_1292 -----GTGTTTTTCATGGGGGGTTCTCT-TGT-CTTCTGTCTGG----- 37
10-OK-1.3_314 -----TCGATTCTCTGGTGTGTTGCTG-TTCGTGTTTTTGTGG----- 37
10-UC-1.3_388 -----TCGATTCTCTGGTGTGTTGCTG-TTCGTGTTTTTGTGG----- 37
10-CD-1.3_235 -----TGGCGTATTCTGTGGTTTTTTG-TG-GTCGTGTTCTTGG----- 37
20-OK-1.3_127 -----TGCTGTGTGGGTT-GTTTCTG-ATGGTCTT-GTTTGTCTG----- 37
T-UC-1.3_79 -----GTGGTTTTGGTCTTCTGCTGTTCTTTGTGTGTCTGTGTG----- 37
40-OK-1.3_138 -----TCGTGGTC--TCCGGGTGGTTCT-GTG-CTGTTTATTGTGG----- 37
cap-UC-1.3_791 -----TGTGGTTGTCCC GGTAATTCTTAGTG-GTGTGTTGGCGTG----- 38
T-OK-1.3_76 -----GTTGTTTTTCACTGGGTTTGTGTTGCG-GCTTTTTCTGG----- 37
10-CD-1.3_406 -----TTGGGTTGTTTCTGGGCTTGTGTTGGG-A--TTGTCTGGTC----- 37
cap-UC-1.3_357 -----TGGGGATCTGTGGTTTGTGTTGTCTGTCTGTGCGTGG----- 37
cap-UC-1.3_1191 -----TTGGGGTGGTCTCATTG--TGGTTCTTGTCTGCGTGTG----- 37
1.....10.....20.....30.....40.....50.....

```



```

cap-UC-1.3_370 -----TCGCCGTCATGTCCCCGGTAGCTCCTTGTGGTTGGG----- 38
T-OK-1.3_32 -----TTCCCCGGGCTGT-TACTCTGTCGTTGTTGTGTCTGG----- 37
cap-UC-1.3_489 -----CCCCCGCCTGTGTGTTCGTTGTTCTGGTCCGTG----- 37
cap-UC-1.3_949 -----CCCCCCCCTTGTGGATTCTCCG-GTTGTTTCTTGTG----- 36
10-OK-1.3_459 -----TTGGGTCTTGTTTTTTGCCTCGCGTGTTCGTATGTGTG--- 37
cap-UC-1.3_502 -----TTTCGCGGGTTTGTTTTTTCG--GGGTGATCGT-TCTGTGG-- 37
T-OK-1.3_93 -----TTTCCTTCTGCGGGTATTGTTTTGGTTGTGTGTTCTC----- 37
40-UC-1.3_211 -----TGTCTGTCGTGGGGTCTTGTTTGGG--ATTCTGGTCTTC----- 37
cap-UC-1.3_1153 -----GGTCTGTGTCGTTGCTGCTGTTGTTCTATGTTAGTTCTGGC----- 38
cap-UC-1.3_332 -----TTGCGGCTCTGTGGGTTTCTGTCTGGGTTACTCGTGG----- 37
40-OK-1.3_155 -----TTGTGGTTTTCTGTTG-TGGTTTTGTGTCTCT-TCTGATG----- 37
40-UC-1.3_82 -----TTGTGGTTTTCTGTTG-TGGTTTTGTGTCTCT-TCTGATG----- 37
cap-UC-1.3_1171 -----TTGTGGTTTTTGTGC-TGGTTTTGGATCTGTATCTGGG----- 37
40-OK-1.3_194 -----TCCTTGTGATTCCCCGTT-GCGTTTTGG--CGGTGTTGG----- 37
cap-OK-1.3_127 -----TCCTTGTGATTCCCCGTT-GCGTTTTGG--CGGTGTTGG----- 37
cap-UC-1.3_916 -----TGTGTTGTGATTGCCCTTC-TCGTTTTGG--CTGT-GTTG----- 37
cap-UC-1.3_506 -----TTGTGGTTATTCTGCGTT-CGGTGTGG--CTGTTTTTTG----- 37
cap-UC-1.3_549 -----TGTGTGTCCTCTGTTGGTGTACT-T-TGTCTGGTTTG----- 36
cap-UC-1.3_1282 -----GTTGTGTTTCTGTCG-TGTTATGGT-TGTCTGTTGTGT----- 37
cap-UC-1.3_1013 -----TTTGTGGGGTT-TTGGTG--TGGTACTCTGTCT-TGGTCTG----- 37
80-CD-1.3_137 -----TGTGGTGTGCTGGTG--TGGTATTTTGTATCTGGTTTG----- 37
10-OK-1.3_185 -----TCGCGGTGTTTGTG--TGGTTCCT-TCCTTGGTTGGTTG----- 37
10-UC-1.3_399 -----GTGTTGTCTTTTG--TGGTTCCGTGGTTGTTTTCTTGG----- 37
1.....10.....20.....30.....40.....50.....

```



|                 |                                                      |    |
|-----------------|------------------------------------------------------|----|
| cap-UC-1.3_446  | -----TCGTTCTTTGTT--GGTTCCTTGGTCTTGTGTTGTTGGG-----    | 37 |
| T-OK-1.3_125    | -----GGCTGTTTTGCTTC--TGGTTGCTCGTGTGTTGTTGTTG-----    | 37 |
| cap-UC-1.3_1201 | -----TTGGCAATGTGTTTGTC--CGGGAATTTTTCTGTTGGTGGC-----  | 37 |
| cap-UC-1.3_1358 | -----TGTGTGGGTTAAGTTTGTC--GTTTTTTTTGGGTGGTTG-----    | 37 |
| 10-OK-1.3_346   | -----CTGTTGCTTTC--GGTGTTCCTGCTGGGTTGTGGTTGTG-----    | 37 |
| cap-UC-1.3_792  | -----TGTGGCTTACTGGGGTTTTCTTCGTCTTGTGGTTGAG-----      | 37 |
| 20-UC-1.3_155   | -----TGTGGGGTTTTTT--CGGGG--GGTGCTTCAATTGTTGTGTG----- | 37 |
| 40-UC-1.3_41    | ---TTCGTGGGGCCTAGTGCGTGG--GGTG-TTCTCTGTTGTG-----     | 37 |
| 10-OK-1.3_585   | ---CTCTTGTGGCTTTTTCCGGGCT--GGTTCCTCGTGGTTG-----      | 37 |
| 10-OK-1.3_630   | -----AGGTGTTTTCCCCCCC--GCTGTTTTCGTTGTTGATGTG-----    | 36 |
| cap-UC-1.3_351  | -----TGTTTTGTGCCCCGCC--GCGTTTTG--GTTGATTTGTGG-----   | 37 |
| cap-UC-1.3_973  | -----TTGTGCCGTGTTCCGCCG--TGTGTCTTAT--TTGGTTTG-----   | 37 |
| cap-UC-1.3_761  | -----TTGGTGCTCGTTGTTTTCTTCTTCTGGCTTGGTGG-----        | 37 |
| cap-UC-1.3_1068 | -----GTCGTGCTCCATGTTTTGTGTCCTCCTT-TGTGTTGGG-----     | 37 |
| 40-UC-1.3_96    | -----TGTTCAATTGCTTCAATTCCTTTCCTTGGTTGTTTGTGG-----    | 35 |
| cap-UC-1.3_731  | -----GTCCCCCTGT-TGTGTATTCAATTCCTGGTCTGGTTTTGTG-----  | 37 |
| cap-UC-1.3_941  | -----GGCCCCCTGT-TCTATGGT--TCCGCGTGTGTTTTGGTGT-----   | 37 |
| cap-UC-1.3_1080 | -----CTGCGGGTGTGTGTTCTGTTCAATGGTGGTGTGTTTTGTC-----   | 37 |
| cap-UC-1.3_1246 | -----TGCGTGTGTGTTATTTCTTTCCGGTGGGGTTTTGTGC-----      | 37 |
| 10-OK-1.3_345   | -----GAGTTCCCCCGGCTGTTCGTGTGTCTTGTCTTCCGTGG-----     | 38 |
| 40-CD-1.3_150   | -----GAGTTCCCCCGGCTGTTCGTGTGTCTTGTCTTCCGTGG-----     | 38 |
| cap-UC-1.3_898  | -----TTTGCCCCGTAACGTTCCGGTTGTTGTGCTCGTTGTGG-----     | 37 |
| cap-UC-1.3_617  | -----CTCCCTTGTCTGTTGTCTTTCGCGTGTCTCGGTTCTGTTG-----   | 38 |

1.....10.....20.....30.....40.....50.....



```

10-CD-1.3_468 -----TGTCCCCGGGCTGTGGTCTGTTGTGT--TTGGTCGCTTG--- 37
10-OK-1.3_248 -----TTGGTGTGTTCTGCCGGTTGAATGTTTTTTACGTGGG----- 37
cap-UC-1.3_526 -----TTGGGTATGGTCCCCGGGATGTCTTGTCTTTCGTGG----- 37
cap-UC-1.3_879 -----TTGTGTGGTCCCCAG--TGGCTTTTTTTCTTCGTGGTCGG----- 37
cap-UC-1.3_510 -----TTGTGCGTTCCCTGGG--TGCCGTTCTTTGTGTGGGGTC----- 37
cap-UC-1.3_1065 -----GTGTCTTGCCCCG--TGGT-TCGTTTCTGTCGTGTGTG----- 36
10-OK-1.3_619 -----TGGTATGTTTTCCGGGGTCGAGG-TATTGGATATTTCG----- 37
cap-UC-1.3_1278 -----TATGCTTTTCCGGTTCGTGT-TTTTGGGTTCTTCGTGG----- 37
cap-UC-1.3_471 -----TCCGTTTTCGTGGCTGTCTG-GGGTGT-TATTGCTTATG----- 37
cap-UC-1.3_952 -----ATGTTTTCTGGCC-CCGG-TGTTGG-TTGTGCGTATTGC----- 37
10-UC-1.3_502 -----TTCTCTCCGTGGTGTTGCGT-TCTGGGGTTGTCTGTGCC----- 37
cap-UC-1.3_1072 -----GCTTTCGTCGTTGT-TCGCGTGTCCCCGGTTGT-TGTGG----- 37
40-UC-1.3_50 -----ATCGTCTGGTTGTCGCGCTGGTATTG-GGTTCTTCTGCC----- 37
cap-UC-1.3_250 -----TCGTCTTTCGGTCCCGG-GGTGTTGTGGTGCTTCTGG----- 36
40-UC-1.3_261 -----GTGTTGC-GCTTTTCTCCGGTTTGTCT-TTGGGTGTAG----- 37
cap-UC-1.3_1323 -----CTTCGTTGC-GTCCCCCGGTTGTTGTGTTTCTTGGGTG----- 37
20-OK-1.3_169 -----GTCTCGTGGTTGTGGGT---CCCGGTGTTGTTTTGTTGTG----- 37
40-UC-1.3_222 -----GTCTGG-GGTTCTGGTC---TCTCTCGTT-TTGTATGGTGGT----- 37
40-UC-1.3_422 -----TTGCTGGGCCCCAGG--TATTCTTGTATTGGTTTGTG----- 37
cap-UC-1.3_806 -----TGCGGGGCCCCGGGC---TATCTTCTTCTCTGTGTTGTGG----- 37
cap-UC-1.3_846 -----GGTGGTCCCGCGT-TGTGCCTTTTCTCTTGGTTTGTGG----- 37
cap-UC-1.3_918 -----TGGCCCCCGTCTGTTCTCTTGTTCCTGAATGGTGG----- 36
40-OK-1.3_15 -----TAACGTCTTGGGGCCCCGGTATTGGTCTATGTCTCG----- 36
1.....10.....20.....30.....40.....50.....

```



|                 |                                                                                                                                                              |    |
|-----------------|--------------------------------------------------------------------------------------------------------------------------------------------------------------|----|
| 40-UC-1.3_100   | -----TAA <b>C</b> GTCTTGGGG <b>C</b> CCCGGTATTGGTCTATGTCTCG-----                                                                                             | 36 |
| cap-UC-1.3_1189 | -----TTGGTAA <b>A</b> TACGGCTGGGG <b>G</b> CTATTGGTTCGTGTAG <b>T</b> C-----                                                                                  | 37 |
| cap-OK-1.3_39   | -----TTGCCGGGTAC <b>C</b> TATTGTT <b>C</b> GTCTCCTGTCTGTGTGG-----                                                                                            | 37 |
| cap-UC-1.3_1207 | -----TTGCCGGGTAC <b>C</b> TATTGTT <b>C</b> GTCTCCTGTCTGTGTGG-----                                                                                            | 37 |
| cap-UC-1.3_530  | -----TTGGGGCC <b>C</b> TGGTGGTT <b>C</b> CCGTT-TCTGTGTGGTGTG-----                                                                                            | 37 |
| T-OK-1.3_121    | -----TTG <b>C</b> TTCC <b>T</b> GG <b>C</b> GGCC <b>T</b> TTGTTT-TCTAT <b>T</b> GTGTGTG-----                                                                 | 37 |
| 80-OK-1.3_46    | -----AT <b>C</b> CCCCCGG <b>C</b> GT <b>C</b> GT- <b>T</b> TTGGTGG <b>C</b> ATTTTGT <b>T</b> TGTG-----                                                       | 37 |
| 80-UC-1.3_89    | -----AT <b>C</b> CCCCCGG <b>C</b> GT <b>C</b> GT- <b>T</b> TTGGTGG <b>C</b> ATTTTGT <b>T</b> TGTG-----                                                       | 37 |
| cap-CD-1.3_585  | -----GTG <b>C</b> CCCC <b>C</b> CGT <b>C</b> GT-GGTTA <b>T</b> TTGG <b>A</b> GTTGTTT <b>G</b> -----                                                          | 35 |
| 40-UC-1.3_432   | -----CCCCG <b>C</b> TCCC <b>C</b> TGT <b>C</b> GT <b>C</b> GT--TTGTTT <b>A</b> CTTTTGT <b>T</b> TG <b>C</b> -----                                            | 38 |
| cap-OK-1.3_93   | -----GT <b>C</b> TCAT <b>C</b> CCCGTGT <b>C</b> GT <b>A</b> TT-GGTTA <b>T</b> TC <b>C</b> GGTTT <b>T</b> TC-----                                             | 37 |
| 40-UC-1.3_134   | -----GG <b>C</b> CCCCGT <b>C</b> TACT <b>G</b> AG <b>T</b> CCTGTACTTTTACTGTT <b>C</b> TG-----                                                                | 38 |
| 40-UC-1.3_224   | -----GGTCCG <b>C</b> GGCTTGTGT <b>C</b> TC-TGTT <b>C</b> CTTGGGTGTG <b>C</b> TGG-----                                                                        | 38 |
| 40-UC-1.3_336   | -----CGT <b>C</b> CCCC <b>C</b> CTGGT <b>C</b> T <b>T</b> TT-AGT <b>G</b> CTT <b>C</b> TG-TATGTT <b>G</b> -----                                              | 37 |
| 20-OK-1.3_46    | -----TTGGTGGGT <b>C</b> CTGTGTGGTT <b>C</b> ---GT <b>C</b> GT-TTGGT <b>G</b> CT <b>G</b> CT-----                                                             | 37 |
| 40-OK-1.3_195   | -----TAT <b>G</b> ATT <b>C</b> CTTGG <b>C</b> T <b>C</b> TTG---TT <b>C</b> GTGTGG <b>C</b> G <b>C</b> TGTG-----                                              | 36 |
| cap-UC-1.3_60   | -----TG <b>G</b> TT <b>C</b> CGTGGT <b>C</b> ATTGTGTT <b>C</b> CGT <b>G</b> CTGGGTTT <b>G</b> TG-----                                                        | 37 |
| cap-UC-1.3_1064 | -----GT <b>G</b> TGT <b>C</b> CGGGG <b>A</b> T <b>T</b> G-GTT <b>C</b> CT <b>A</b> CT <b>A</b> AGT <b>G</b> T <b>G</b> TG-----                               | 37 |
| 40-OK-1.3_125   | -----CGT <b>C</b> CA <b>C</b> CTT <b>C</b> GC <b>G</b> T <b>T</b> AGTTT <b>G</b> TCTGG <b>A</b> T <b>A</b> CTTT <b>G</b> GG-----                             | 38 |
| 40-UC-1.3_107   | -----CGT <b>C</b> CA <b>C</b> CTT <b>C</b> GC <b>G</b> T <b>T</b> AGTTT <b>G</b> TCTGG <b>A</b> T <b>A</b> CTTT <b>G</b> GG-----                             | 38 |
| cap-UC-1.3_939  | -----GGG <b>C</b> CA <b>C</b> CT <b>C</b> TT <b>C</b> GT <b>G</b> TATTGGG <b>T</b> CT <b>C</b> T <b>G</b> CA <b>T</b> AGG-----                               | 37 |
| 80-OK-1.3_212   | -----A <b>C</b> CCCC <b>C</b> TT <b>A</b> CC <b>A</b> CG <b>A</b> AT <b>C</b> GAT <b>G</b> CA <b>T</b> TTT <b>G</b> G <b>A</b> CG <b>C</b> GG <b>C</b> ----- | 38 |
| 40-UC-1.3_404   | -----C <b>C</b> CCCC <b>C</b> TC <b>A</b> GA <b>A</b> CG <b>A</b> T <b>A</b> AC <b>C</b> CG <b>T</b> ATT <b>G</b> G <b>A</b> CT <b>G</b> CA-----             | 38 |

1.....10.....20.....30.....40.....50.....

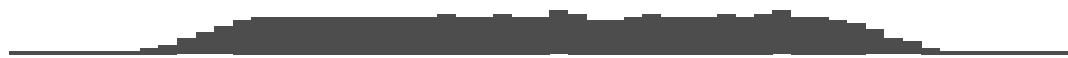

|               |                                                  |    |
|---------------|--------------------------------------------------|----|
| 80-UC-1.3_88  | -----CCACCGCTCGAGACATGAGACGTTTATTGCCCCCAG-----   | 38 |
| 40-UC-1.3_339 | -----AACCCACCCGTCGGTCCACAATTCTTTTTCTCGCTA-----   | 36 |
| 40-CD-1.3_123 | -----TCTCACCCAAACCCAGACCGATATCTTCTCCCGATCA-----  | 38 |
| 40-OK-1.3_252 | -----ACCTCACCAAACCATTTACACATACGTGGACGGATCTA----- | 38 |
|               | 1.....10.....20.....30.....40.....50.....        |    |

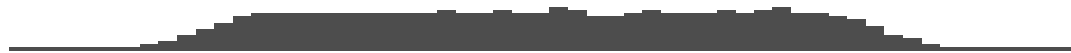

Supplement: mmc1.pdf [file mmc1.pdf]
